# Supplementary material
Source: publisher figshare collection journal article supplement (https://gsajournals.figshare.com/ndownloader/files/14597300)
Supplement: Supplementary file 1 [file 14597300]

## Sheet: upregulated in asl
Symbol	logFC	logCPM	PValue	FDR	asl_rep1	asl_rep2	asl_rep3	yw_rep1	yw_rep2	yw_rep3	avg asl	avg yw
CG34138	-5.81993	5.64533	1.80961e-277	1.24401e-273	1628	1558	1580	33	30	25	1588.67	29.3333
CG17352	-4.95193	7.30958	4.94062e-255	2.26428e-251	5584	4367	5043	193	202	112	4998	169
miple	-4.41821	6.08547	4.15039e-204	8.15196e-201	2193	2089	2008	118	91	98	2096.67	102.333
l(2)03659	-5.19073	4.70254	5.70755e-175	8.71923e-172	894	825	744	16	32	22	821	23.3333
Cyp6a17	-5.62412	3.91803	1.07565e-163	1.47892e-160	547	446	450	11	7	12	481	10
mthl6	-11.0186	4.81952	6.71307e-140	7.09984e-137	846	698	1188	0	1	0	910.667	0.333333
Ac76E	-4.47559	3.61751	2.56196e-123	2.34829e-120	436	355	352	18	18	17	381	17.6667
CG5195	-5.0912	4.06977	3.56443e-120	3.06296e-117	647	395	557	16	16	16	533	16
CG31477	-3.8587	4.66308	1.38669e-117	1.12151e-114	814	729	759	75	54	37	767.333	55.3333
CG12224	-6.25144	2.84366	1.16442e-95	8.89422e-93	239	200	246	1	5	3	228.333	3
CG4562	-4.42767	3.13619	6.1475e-95	4.44853e-92	310	238	268	18	9	12	272	13
CG5697	-7.15791	2.65141	4.30509e-88	2.8186e-85	268	162	178	1	2	1	202.667	1.33333
CG11966	-6.52444	2.77125	5.50741e-85	3.44188e-82	222	186	244	1	1	5	217.333	2.33333
CG17124	-3.09584	4.49153	4.98443e-73	2.97961e-70	803	579	590	110	70	59	657.333	79.6667
CG42708	-4.28943	2.81419	5.52683e-72	3.03953e-69	281	178	193	11	13	10	217.333	11.3333
CG4822	-4.97409	2.96695	2.69979e-69	1.42767e-66	235	242	253	15	2	7	243.333	8
CG6330	-3.95745	4.5073	2.58927e-68	1.31851e-65	1022	577	519	61	42	36	706	46.3333
CG3259	-3.01819	3.55227	4.48857e-67	2.20405e-64	346	318	346	49	43	38	336.667	43.3333
CG3552	-1.98172	5.83788	1.08861e-66	5.16116e-64	1537	1397	1491	362	414	391	1475	389
Ddc	-3.92342	2.66783	1.73863e-65	7.7111e-63	214	166	196	12	10	17	192	13
Arc1	-2.24243	5.58817	3.49921e-63	1.37459e-60	1376	1294	1184	307	339	210	1284.67	285.333
CG30345	-5.04529	2.79038	1.17016e-62	4.46903e-60	302	189	165	10	4	6	218.667	6.66667
CG14985	-2.24102	4.31831	2.64252e-61	9.56107e-59	588	497	515	136	109	107	533.333	117.333
CG32318	-1.70788	5.74901	5.52193e-61	1.94669e-58	1490	1292	1224	431	431	412	1335.33	424.667
CG6071	-2.65866	3.687	3.56648e-58	1.16751e-55	368	353	354	62	67	49	358.333	59.3333
CG17341	-9.61392	1.60362	1.17285e-57	3.71863e-55	126	78	86	0	0	0	96.6667	0
CG9192	-3.67092	3.3687	1.19005e-57	3.71863e-55	321	346	258	26	32	18	308.333	25.3333
Tret1-1	-3.12487	3.2685	4.71194e-54	1.32213e-51	331	280	229	34	43	23	280	33.3333
Ugt86Di	-1.51491	6.12181	3.83116e-47	9.9386e-45	1981	1483	1581	671	632	529	1681.67	610.667
UK114	-4.19452	2.39538	1.48087e-45	3.57202e-43	148	182	147	9	7	11	159	9
CG7900	-2.01342	4.10492	4.96147e-44	1.17613e-41	521	419	403	139	116	91	447.667	115.333
CG32088	-3.26581	2.14078	1.33307e-43	3.1065e-41	152	108	124	12	15	14	128	13.6667
Psf1	-1.63652	4.99181	7.99373e-43	1.80174e-40	850	712	778	275	285	225	780	261.667
CG10527	-1.63293	6.59093	5.06203e-42	1.12255e-39	2660	2307	2130	695	895	785	2365.67	791.667
Mgstl	-1.65172	6.44537	2.67761e-41	5.84356e-39	2458	2017	1973	681	887	575	2149.33	714.333
CG3961	-1.68802	4.69712	4.0262e-41	8.64941e-39	793	573	571	197	231	193	645.667	207
wun2	-1.81481	4.57803	1.66552e-40	3.46957e-38	728	550	539	215	176	145	605.667	178.667
CG5022	-4.80436	1.84864	8.7889e-40	1.80356e-37	104	90	137	3	3	6	110.333	4
Ets21C	-3.25093	1.90415	1.05607e-39	2.13528e-37	126	95	103	12	14	9	108	11.6667
CG3434	-1.4856	6.27995	1.23683e-39	2.46452e-37	1887	1751	1907	706	744	623	1848.33	691
CG15661	-3.45707	1.91767	6.91524e-38	1.33912e-35	116	116	98	8	12	11	110	10.3333
CG3437	-1.35264	5.59809	6.1009e-36	1.16502e-33	1188	1096	1091	489	498	396	1125	461
AcCoAS	-2.89844	4.94271	1.11426e-35	2.09863e-33	1343	826	524	125	137	106	897.667	122.667
CG15086	-6.92379	0.811003	1.4685e-34	2.69206e-32	62	56	43	1	0	0	53.6667	0.333333
CG10126	-2.34929	4.51206	3.75926e-33	6.54255e-31	860	587	432	145	139	96	626.333	126.667
PGRP-LC	-2.19148	2.6527	3.96465e-33	6.81375e-31	193	151	154	38	44	31	166	37.6667
CG4267	-4.49279	1.95508	3.51943e-32	5.90105e-30	159	126	72	9	3	4	119	5.33333
Cyp6a23	-5.2956	0.868549	2.18593e-31	3.621e-29	62	58	45	3	0	1	55	1.33333
CG16718	-1.20016	5.98683	3.45224e-31	5.65058e-29	1688	1339	1288	707	643	597	1438.33	649
GstE6	-2.3856	2.50395	8.64103e-31	1.39771e-28	150	151	155	32	31	28	152	30.3333
PGRP-LA	-2.71671	1.96825	1.09649e-30	1.75298e-28	114	94	116	18	17	16	108	17
CG44085	-1.65192	4.06377	6.99242e-30	1.05647e-27	506	385	347	157	135	116	412.667	136
CG5455	-2.42431	2.75909	8.07786e-30	1.2072e-27	222	180	150	43	26	37	184	35.3333
CG33217	-1.31387	7.56592	9.47682e-30	1.40104e-27	4442	4188	4452	1662	1967	1857	4360.67	1828.67
Calx	-4.50672	0.86073	1.77002e-29	2.58893e-27	58	49	54	2	2	3	53.6667	2.33333
Scgdelta	-1.3064	5.47556	7.83848e-29	1.12262e-26	1079	983	1010	501	441	359	1024	433.667
phr6-4	-1.42851	4.23717	1.40659e-28	1.97339e-26	518	414	406	162	186	167	446	171.667
CG4686	-1.10479	5.77064	4.24669e-27	5.72429e-25	1387	1112	1134	554	622	574	1211	583.333
Mmp1	-1.36275	6.58	3.02958e-26	3.96702e-24	2911	1982	1888	1091	889	744	2260.33	908
CG31098	-2.1747	2.9207	6.96186e-26	8.86284e-24	237	196	167	37	64	37	200	46
CG11880	-1.34036	4.6459	2.19215e-25	2.76512e-23	696	525	531	285	232	201	584	239.333
CG14907	-1.59069	3.20161	1.3473e-24	1.63929e-22	253	211	204	75	80	75	222.667	76.6667
Caps	-2.15812	2.99038	1.7599e-24	2.12253e-22	196	204	223	38	59	49	207.667	48.6667
CG14830	-1.05991	6.62673	4.08028e-24	4.83618e-22	2290	2007	2186	1056	1165	1021	2161	1080.67
CG3523	-1.49631	7.36871	5.30714e-24	6.23657e-22	5590	3560	2936	1371	1481	1507	4028.67	1453
CG3397	-6.27179	0.222051	1.09673e-23	1.27788e-21	45	31	27	0	0	1	34.3333	0.333333
ImpL2	-1.55985	5.04169	1.89555e-23	2.19007e-21	1026	767	619	333	303	213	804	283
Ilp8	-4.17926	2.24042	2.07194e-23	2.37392e-21	228	139	69	6	9	9	145.333	8
GstE8	-1.92419	2.62774	2.21226e-23	2.51375e-21	160	161	148	50	42	37	156.333	43
gogo	-2.47196	2.28053	1.37448e-22	1.52401e-20	139	96	160	26	30	18	131.667	24.6667
CG7546	-0.932498	8.34093	5.21033e-22	5.6407e-20	8387	6050	6424	4226	3827	3271	6953.67	3774.67
CG43144	-2.11776	2.5486	5.3996e-22	5.79993e-20	152	130	174	36	32	41	152	36.3333
CG42855	-2.4453	2.2758	1.35848e-21	1.41498e-19	164	124	106	29	14	31	131.333	24.6667
CG4210	-1.28341	5.06314	1.3491e-21	1.41498e-19	830	770	698	288	374	321	766	327.667
Damm	-3.0739	1.39194	2.71672e-21	2.76683e-19	66	72	82	4	11	12	73.3333	9
asparagine-synthetase	-1.30616	5.32506	4.11002e-21	4.09483e-19	902	997	852	432	419	322	917	391
CG14207	-0.934318	6.87023	4.6257e-21	4.57545e-19	2992	2244	2281	1471	1362	1239	2505.67	1357.33
CG5707	-6.03546	0.0094824	8.11867e-21	7.86082e-19	34	28	25	0	0	1	29	0.333333
CG14879	-1.9253	2.7644	1.22839e-20	1.17286e-18	204	182	133	46	57	39	173	47.3333
CG9279	-1.99014	1.95519	2.3645e-20	2.22668e-18	117	84	95	26	29	22	98.6667	25.6667
CG32281	-1.13969	4.13648	5.14646e-20	4.78099e-18	444	365	366	194	203	158	391.667	185
CG9961	-3.47676	0.651876	7.50509e-20	6.92534e-18	51	47	34	4	6	2	44	4
Wwox	-1.19226	4.84498	7.85153e-20	7.19671e-18	702	564	676	283	305	294	647.333	294
Cyp4e2	-1.41499	4.70791	3.05755e-19	2.72976e-17	749	547	562	318	230	177	619.333	241.667
CG32055	-2.15467	2.17008	4.68401e-19	4.10194e-17	137	82	134	31	31	20	117.667	27.3333
upd2	-3.12993	1.11532	1.80878e-18	1.49136e-16	91	50	42	6	7	8	61	7
CG14314	-1.30336	4.16712	2.17482e-18	1.76933e-16	453	337	452	187	199	139	414	175
ox	-0.974729	5.97595	3.51854e-18	2.79632e-16	1634	1241	1206	838	726	593	1360.33	719
puc	-0.854842	5.6323	3.87371e-18	3.0609e-16	1209	913	996	612	615	559	1039.33	595.333
mago	-0.860839	7.00069	7.52822e-18	5.81491e-16	2997	2527	2518	1498	1705	1406	2680.67	1536.33
CG15673	-3.26716	0.47447	9.16521e-18	7.0398e-16	42	36	36	5	6	1	38	4
CG43333	-1.16616	4.30975	1.38501e-17	1.05792e-15	524	390	423	251	200	168	445.667	206.333
CG3588	-7.51615	-0.331357	1.67068e-17	1.26907e-15	25	17	25	0	0	0	22.3333	0
CG13117	-1.797	2.97553	2.92713e-17	2.19919e-15	262	164	169	78	61	38	198.333	59
CG32640	-0.959004	7.23114	2.96452e-17	2.21517e-15	3796	3057	2840	1960	1887	1356	3231	1734.33
St3	-2.04405	2.10013	3.31735e-17	2.46542e-15	118	119	92	20	37	26	109.667	27.6667
CG3714	-0.866824	5.42802	3.40851e-17	2.51955e-15	1046	792	875	546	537	461	904.333	514.667
Tg	-1.83864	2.39563	5.29469e-17	3.85168e-15	173	123	101	32	43	39	132.333	38
CG42363	-1.96893	1.97768	1.49847e-16	1.07304e-14	101	103	94	30	19	30	99.3333	26.3333
CG42362	-1.96893	1.97768	1.51268e-16	1.07761e-14	101	103	94	30	19	30	99.3333	26.3333
CG17839	-3.20688	0.423513	3.27548e-16	2.29768e-14	35	35	39	2	7	3	36.3333	4
mag	-3.41437	0.375059	3.4077e-16	2.3783e-14	46	26	35	2	3	5	35.6667	3.33333
Pvf2	-1.19182	4.76536	6.00665e-16	4.10873e-14	731	561	554	353	261	226	615.333	280
plx	-1.24488	4.81999	6.59136e-16	4.48637e-14	782	584	575	275	247	318	647	280
Edg78E	-3.5473	0.489012	8.06065e-16	5.4594e-14	59	27	32	7	2	1	39.3333	3.33333
CG3788	-1.03347	4.82804	8.33162e-16	5.61526e-14	743	562	558	364	300	279	621	314.333
nAcRbeta-21C	-3.99032	-0.00593117	1.11164e-15	7.38357e-14	32	24	26	0	4	1	27.3333	1.66667
CG15449	-1.38286	2.69052	1.24e-15	8.15727e-14	160	146	142	62	66	51	149.333	59.6667
CG34423	-2.80326	0.553837	2.79168e-15	1.80201e-13	49	30	38	5	6	6	39	5.66667
CG9436	-0.858562	5.07703	7.28511e-15	4.59463e-13	835	640	648	415	433	366	707.667	404.667
Cpr76Bc	-7.24095	-0.567556	8.52748e-15	5.32929e-13	17	18	20	0	0	0	18.3333	0
CG10445	-1.05971	4.61043	1.03965e-14	6.46796e-13	577	452	574	243	308	249	534.333	266.667
LamC	-1.29232	6.38524	1.77996e-14	1.09743e-12	2295	1854	1651	589	933	912	1933.33	811.333
Cyp316a1	-4.8402	-0.329985	1.81349e-14	1.11311e-12	22	24	19	1	1	0	21.6667	0.666667
Aprt	-1.08645	3.98564	2.05445e-14	1.2554e-12	395	354	295	178	173	160	348	170.333
CG32641	-0.894103	6.27311	2.44786e-14	1.48918e-12	1929	1551	1431	1039	998	719	1637	918.667
Gadd45	-1.00097	3.95019	2.86007e-14	1.71403e-12	374	293	333	178	170	170	333.333	172.667
CG17841	-0.864358	5.13289	2.86732e-14	1.71403e-12	838	664	704	473	439	350	735.333	420.667
CG42806	-0.819009	6.77706	3.24814e-14	1.93328e-12	2436	2249	2108	1292	1526	1206	2264.33	1341.33
yellow-b	-0.919726	5.17565	4.8135e-14	2.84038e-12	849	766	681	410	490	367	765.333	422.333
CG31769	-4.7636	-0.387395	1.11389e-13	6.48933e-12	25	22	15	1	0	1	20.6667	0.666667
CG43103	-3.37192	0.0521759	1.66175e-13	9.59978e-12	31	29	23	1	5	2	27.6667	2.66667
moody	-1.39553	3.88922	1.75451e-13	1.00932e-11	465	312	275	158	110	141	350.667	136.333
CG14683	-0.742717	6.93864	2.36376e-13	1.34295e-11	2774	2385	2314	1628	1719	1317	2491	1554.67
CG5096	-1.59569	2.48448	3.79797e-13	2.09758e-11	129	112	161	43	55	41	134	46.3333
Cht7	-1.06021	6.85798	3.79881e-13	2.09758e-11	2903	2453	2285	1017	1324	1432	2547	1257.67
CG30187	-1.01361	4.5107	4.81e-13	2.6453e-11	508	518	446	247	263	251	490.667	253.667
Ance-2	-3.82878	-0.141588	5.00072e-13	2.73924e-11	26	29	18	1	2	2	24.3333	1.66667
PGRP-SA	-1.88443	1.33738	5.14491e-13	2.79594e-11	77	54	56	15	16	21	62.3333	17.3333
CG5835	-1.0198	3.60305	5.23173e-13	2.83193e-11	294	243	251	153	143	109	262.667	135
Gpo-1	-1.03213	3.73131	6.09501e-13	3.23553e-11	334	280	251	138	164	137	288.333	146.333
GS	-0.719644	7.89527	6.41663e-13	3.39316e-11	5913	3858	4781	3105	3172	2833	4850.67	3036.67
Dif	-1.44457	3.25878	9.15408e-13	4.8038e-11	264	244	169	81	82	94	225.667	85.6667
Obp99a	-1.15862	4.4636	9.91613e-13	5.18391e-11	588	467	430	189	301	201	495	230.333
Cyp4d8	-3.03834	0.285831	1.08672e-12	5.63823e-11	31	24	42	2	7	3	32.3333	4
amd	-1.01604	3.52389	1.46324e-12	7.53487e-11	306	205	238	131	139	113	249.667	127.667
CG33170	-0.764907	6.13925	1.77976e-12	9.13057e-11	1516	1351	1437	869	921	849	1434.67	879.667
Sik3	-0.71795	6.78047	2.28281e-12	1.15817e-10	2661	2085	1940	1534	1429	1252	2228.67	1405
CG15117	-2.82925	0.225518	2.80022e-12	1.40001e-10	31	31	29	1	6	6	30.3333	4.33333
Ada	-1.3019	2.97849	4.57504e-12	2.26267e-10	192	190	157	93	66	69	179.667	76
CG34325	-1.19245	2.93345	5.66799e-12	2.78319e-10	208	158	148	95	72	66	171.333	77.6667
Cyt-c-p	-0.778257	6.26275	6.21809e-12	3.04244e-10	1894	1499	1349	985	1091	799	1580.67	958.333
CG9344	-0.797188	5.76794	6.52099e-12	3.17933e-10	1271	1141	952	703	765	555	1121.33	674.333
Clect27	-0.895721	5.41181	1.03465e-11	4.92228e-10	1008	838	848	417	562	520	898	499.667
CG15784	-0.798058	5.25843	1.24618e-11	5.90817e-10	900	649	821	464	483	463	790	470
CG10257	-4.14267	-0.465386	1.51462e-11	7.10733e-10	22	22	13	2	1	0	19	1
CG16985	-0.959613	4.25965	1.53236e-11	7.16613e-10	428	421	373	204	234	217	407.333	218.333
GNBP2	-1.03862	4.27767	1.73357e-11	8.0252e-10	409	432	415	192	247	202	418.667	213.667
CG7565	-1.09621	3.59342	1.92072e-11	8.86174e-10	312	247	239	161	110	116	266	129
Spindly	-0.683602	6.48323	1.98667e-11	9.13534e-10	1958	1576	1832	1212	1188	1075	1788.67	1158.33
CG11875	-0.778494	5.21597	2.30931e-11	1.05836e-09	847	748	686	453	529	405	760.333	462.333
CG7367	-1.27488	3.137	2.3702e-11	1.08265e-09	235	194	173	107	97	56	200.667	86.6667
CG10877	-0.881398	4.2759	2.49128e-11	1.13419e-09	489	382	352	214	254	219	407.667	229
CG8852	-1.26195	3.35857	2.81226e-11	1.2719e-09	214	228	252	89	122	93	231.333	101.333
Parp	-0.66094	7.50079	4.50329e-11	2.01025e-09	3945	3472	3370	2255	2469	2361	3595.67	2361.67
CG5642	-0.588469	8.81947	4.79784e-11	2.13481e-09	9964	7780	8734	6214	6445	5628	8826	6095.67
Cpr65Ax1	-6.78296	-0.934528	4.87386e-11	2.16163e-09	14	16	10	0	0	0	13.3333	0
beat-IIb	-2.22091	1.69212	6.65463e-11	2.86817e-09	125	59	71	31	17	8	85	18.6667
CG17083	-3.84976	-0.385556	8.3226e-11	3.53171e-09	20	26	14	1	2	1	20	1.33333
Men-b	-0.693126	6.29408	8.43034e-11	3.56642e-09	1792	1506	1425	968	1095	969	1574.33	1010.67
CG1572	-0.846623	6.31984	8.63255e-11	3.64076e-09	1749	1589	1640	810	1139	937	1659.33	962
scaf	-0.833855	6.28197	1.12928e-10	4.63475e-09	2196	1428	1295	931	993	903	1639.67	942.333
insc	-1.18707	3.62859	1.48573e-10	6.02574e-09	369	224	248	158	104	117	280.333	126.333
CG18641	-2.22032	0.703336	1.96129e-10	7.88471e-09	53	38	32	16	4	7	41	9
Gr61a	-1.33948	2.19275	2.13056e-10	8.54023e-09	106	99	107	36	44	48	104	42.6667
RhoGDI	-0.616171	8.71463	2.71862e-10	1.08343e-08	8877	7871	7954	5384	6098	5310	8234	5597.33
Prx3	-0.621995	6.74343	3.07412e-10	1.22156e-08	2382	1934	2014	1419	1601	1262	2110	1427.33
CG3253	-1.20104	2.75342	3.08729e-10	1.22326e-08	143	154	152	66	68	70	149.667	68
Uch	-0.578222	7.43546	3.9205e-10	1.5357e-08	3673	3138	3272	2523	2525	2008	3361	2352
CG1890	-0.65819	6.58868	4.2249e-10	1.65023e-08	2265	1825	1665	1364	1365	1065	1918.33	1264.67
Cas	-0.562834	8.69868	4.3049e-10	1.67198e-08	8980	7307	7860	5758	5890	5334	8049	5660.67
Cyp18a1	-2.42051	1.73813	4.38867e-10	1.69971e-08	113	76	79	35	11	6	89.3333	17.3333
Arc2	-1.12909	2.66976	4.53178e-10	1.75021e-08	150	131	138	64	84	52	139.667	66.6667
Chd64	-0.655157	8.59065	4.59981e-10	1.7714e-08	8558	7132	7282	4573	5480	5066	7657.33	5039.67
Gapdh1	-0.643139	7.92852	4.6253e-10	1.7714e-08	6042	4306	4239	3612	3384	2680	4862.33	3225.33
mRpS14	-0.896614	3.50968	4.84255e-10	1.84945e-08	277	220	221	130	158	113	239.333	133.667
yellow-c	-0.784006	5.26127	5.54924e-10	2.09606e-08	858	804	691	441	550	435	784.333	475.333
CG43338	-3.02571	0.184549	5.75226e-10	2.16087e-08	36	16	38	5	0	6	30	3.66667
CG9411	-1.20378	4.18078	6.20824e-10	2.32581e-08	616	320	316	208	171	173	417.333	184
CG33155	-0.757563	5.70579	7.20742e-10	2.67102e-08	1089	1068	1015	628	793	550	1057.33	657
Rep	-0.591174	5.68119	7.5873e-10	2.79672e-08	1163	896	950	714	735	624	1003	691
CG13954	-1.85428	1.30431	7.83163e-10	2.86548e-08	53	71	56	12	21	19	60	17.3333
Osi14	-1.18876	3.92913	7.83635e-10	2.86548e-08	404	313	313	110	181	174	343.333	155
CG14174	-0.796927	4.46582	7.87009e-10	2.87018e-08	489	404	467	255	318	243	453.333	272
EndoG	-0.701119	5.5611	8.15835e-10	2.96744e-08	1063	915	865	586	721	518	947.667	608.333
CG31955	-1.357	1.78839	8.82916e-10	3.20296e-08	95	71	70	27	33	35	78.6667	31.6667
GstE3	-1.43815	1.6547	8.96569e-10	3.24393e-08	78	72	67	21	32	30	72.3333	27.6667
scb	-1.02289	6.1888	9.60726e-10	3.43985e-08	2054	1391	1364	1125	721	607	1603	817.667
CG8027	-0.77844	4.13776	9.60115e-10	3.43985e-08	401	342	335	237	210	206	359.333	217.667
CG31030	-0.935026	3.07387	9.69897e-10	3.46367e-08	199	171	163	102	103	85	177.667	96.6667
CG14301	-0.621964	5.68464	1.05096e-09	3.74344e-08	1114	923	995	702	772	582	1010.67	685.333
Pvf1	-1.46582	2.54699	1.24713e-09	4.40791e-08	191	88	138	63	55	37	139	51.6667
Nlg1	-1.36678	3.18669	1.38473e-09	4.85679e-08	214	200	217	125	69	63	210.333	85.6667
mRpL53	-0.737978	5.92078	1.44294e-09	5.0481e-08	1275	1238	1153	732	924	651	1222	769
CG10581	-1.14284	2.51595	1.44718e-09	5.05009e-08	164	109	107	60	57	60	126.667	59
CG7506	-0.686587	4.64145	1.4523e-09	5.0551e-08	545	474	474	332	339	295	497.667	322
CG5618	-0.98335	4.79492	1.50507e-09	5.22555e-08	615	576	592	270	416	261	594.333	315.667
rtet	-0.655061	5.88806	1.82469e-09	6.27191e-08	1421	1070	1052	891	795	650	1181	778.667
CG12746	-0.676737	4.63213	1.8501e-09	6.32762e-08	576	453	456	332	329	302	495	321
CG10463	-0.666457	5.30969	1.85769e-09	6.33781e-08	898	712	760	586	542	428	790	518.667
vir-1	-0.614592	5.80258	1.92396e-09	6.53148e-08	1348	971	988	823	772	642	1102.33	745.667
CG3630	-0.697973	5.5377	2.42612e-09	8.15567e-08	1151	752	915	585	695	517	939.333	599
sda	-0.704542	8.06408	2.58855e-09	8.63833e-08	6819	5042	4428	3213	3517	3531	5429.67	3420.33
CG1988	-1.28555	2.76037	2.68302e-09	8.93193e-08	161	151	149	46	74	76	153.667	65.3333
CG10337	-0.907396	4.15448	3.19057e-09	1.05704e-07	393	378	351	180	252	193	374	208.333
RhoL	-0.781537	4.28108	3.20707e-09	1.05995e-07	463	376	356	229	286	208	398.333	241
Jra	-0.603313	6.07085	3.29659e-09	1.08693e-07	1494	1215	1241	942	979	786	1316.67	902.333
Nmdmc	-0.655894	5.79778	4.39348e-09	1.43824e-07	1352	1047	930	737	836	620	1109.67	731
mtacp1	-0.581098	7.02781	4.53625e-09	1.47444e-07	2867	2398	2355	1789	1973	1546	2540	1769.33
CG1299	-0.702632	4.70372	4.6827e-09	1.51488e-07	625	500	448	333	353	315	524.333	333.667
CG10559	-1.12299	2.36934	4.92536e-09	1.58255e-07	119	116	103	52	65	45	112.667	54
GstD1	-0.54401	9.54796	4.92641e-09	1.58255e-07	16784	12418	14229	11140	10929	8884	14477	10317.7
NLaz	-3.44986	-0.430563	5.11865e-09	1.63666e-07	31	14	12	3	2	0	19	1.66667
Mpcp	-0.512845	8.85251	5.59062e-09	1.77929e-07	10136	7989	8412	6609	6923	5793	8845.67	6441.67
CG13278	-1.23027	1.85167	6.53482e-09	2.06546e-07	89	74	77	31	39	36	80	35.3333
EndoGI	-0.565917	6.947	6.66453e-09	2.10162e-07	2783	2207	2200	1679	1763	1591	2396.67	1677.67
Lcp65Ag2	-1.79573	1.19375	8.48036e-09	2.63198e-07	67	57	42	8	19	22	55.3333	16.3333
mGluRA	-2.35685	0.0494117	1.02396e-08	3.14954e-07	34	20	22	4	5	6	25.3333	5
CG5525	-0.519461	9.13239	1.0447e-08	3.19901e-07	12425	9618	10259	7915	8648	6862	10767.3	7808.33
CG16800	-3.74659	-0.775635	1.12958e-08	3.4436e-07	12	17	14	2	0	1	14.3333	1
Cyp6d2	-1.18851	2.25617	1.21896e-08	3.69153e-07	105	103	108	62	44	39	105.333	48.3333
FK506-bp1	-0.528829	9.22865	1.30961e-08	3.94864e-07	12962	10626	10958	8072	9192	7635	11515.3	8299.67
CG13618	-3.32886	-0.529714	1.31555e-08	3.95787e-07	25	15	12	5	0	0	17.3333	1.66667
CG3008	-0.549565	6.45275	1.70061e-08	5.03916e-07	1943	1518	1617	1253	1281	1071	1692.67	1201.67
CG6931	-0.711627	3.98624	1.78071e-08	5.26514e-07	362	283	310	199	227	180	318.333	202
RpLP2	-0.58411	10.2209	2.06371e-08	6.04988e-07	25331	23305	20920	15389	17817	15166	23185.3	16124
rpr	-0.825531	4.86718	2.12053e-08	6.19007e-07	636	593	577	312	358	387	602	352.333
CG34125	-0.54637	5.92034	2.22563e-08	6.48309e-07	1322	1049	1132	882	878	735	1167.67	831.667
Cyp1	-0.500032	10.6062	2.3429e-08	6.7959e-07	34343	26847	28030	22889	23460	19228	29740	21859
PGRP-LF	-1.24622	1.79758	2.35321e-08	6.81142e-07	88	63	81	29	35	37	77.3333	33.6667
CG3036	-0.997934	4.54382	2.69156e-08	7.67765e-07	670	403	455	352	232	205	509.333	263
CG7787	-0.776145	4.86639	2.80444e-08	7.96659e-07	595	515	671	389	375	324	593.667	362.667
l(2)37Cc	-0.497751	7.89937	3.00402e-08	8.51592e-07	5180	4100	4360	3383	3691	2973	4546.67	3349
CG3168	-0.880451	5.40763	3.23509e-08	9.11461e-07	1133	842	721	656	507	361	898.667	508
viaf	-0.595816	6.28624	3.2673e-08	9.17182e-07	1897	1281	1432	1121	1146	890	1536.67	1052.33
CG6752	-0.698774	4.86511	3.29103e-08	9.21555e-07	624	567	556	356	395	369	582.333	373.333
Treh	-0.586068	6.58873	3.85013e-08	1.06296e-06	2141	1828	1659	1457	1354	1099	1876	1303.33
Cyp4e3	-4.0239	-0.964546	4.19556e-08	1.15369e-06	16	12	9	1	1	0	12.3333	0.666667
CG18507	-0.738811	5.34925	4.31542e-08	1.17958e-06	943	768	771	428	559	549	827.333	512
CG12171	-0.638788	5.08826	4.51993e-08	1.23059e-06	802	633	586	466	494	388	673.667	449.333
Traf-like	-0.648711	5.5133	4.56473e-08	1.24033e-06	932	899	867	575	698	530	899.333	601
CG3649	-0.761559	5.13806	4.59597e-08	1.24635e-06	923	596	656	543	434	350	725	442.333
sni	-0.770506	4.44375	4.73918e-08	1.28014e-06	496	457	377	261	320	233	443.333	271.333
CG12868	-0.945625	3.3421	5.28576e-08	1.41665e-06	229	189	226	103	113	130	214.667	115.333
CG9350	-0.531291	6.02128	5.50218e-08	1.47178e-06	1479	1130	1142	919	954	817	1250.33	896.667
CG14397	-2.66009	-0.351845	5.56595e-08	1.48307e-06	25	14	18	2	4	3	19	3
CG9836	-0.533787	5.99777	6.24821e-08	1.65205e-06	1379	1133	1168	876	966	802	1226.67	881.333
Myo61F	-0.564445	6.45674	6.3291e-08	1.66703e-06	1989	1503	1628	1364	1211	1023	1706.67	1199.33
CG10200	-0.643727	6.89756	7.15816e-08	1.87462e-06	2608	2002	2475	1855	1652	1235	2361.67	1580.67
exba	-0.508148	10.5677	7.96029e-08	2.07284e-06	33358	27370	26255	23142	22379	18183	28994.3	21234.7
BthD	-0.647439	5.70239	8.03655e-08	2.08147e-06	1081	1022	975	606	766	676	1026	682.667
CG4199	-0.484133	7.77569	8.09197e-08	2.08736e-06	4965	3740	3803	3245	3245	2776	4169.33	3088.67
upd3	-1.49112	1.08079	8.13139e-08	2.0936e-06	57	42	46	17	13	23	48.3333	17.6667
CG42588	-0.553806	5.60237	8.54271e-08	2.1954e-06	1086	892	838	724	663	605	938.667	664
Obp73a	-1.44305	1.17951	9.16749e-08	2.34282e-06	53	44	57	22	25	12	51.3333	19.6667
GstE5	-1.45426	2.62898	1.02022e-07	2.58802e-06	174	158	104	83	44	39	145.333	55.3333
CG7183	-0.633584	4.42757	1.25686e-07	3.15338e-06	472	367	432	285	313	254	423.667	284
Surf6	-0.578197	6.09773	1.31971e-07	3.29902e-06	1425	1304	1250	913	1044	828	1326.33	928.333
CG10365	-1.20279	2.29093	1.40654e-07	3.50971e-06	92	115	116	49	58	41	107.667	49.3333
CG17337	-0.519097	7.27705	1.50806e-07	3.75622e-06	3207	2836	2833	2320	2241	1907	2958.67	2156
tsr = cofilin	-0.519545	10.3479	1.5119e-07	3.75896e-06	26528	23906	24110	19828	19402	15262	24848	18164
CG10098	-0.59631	6.03372	1.56424e-07	3.87508e-06	1525	1107	1225	1038	874	737	1285.67	883
phm	-1.3932	1.15231	1.61203e-07	3.98629e-06	2266	1860	2021	2402	2678	1980	2049	2353.33
CG11309	-0.594014	4.58278	1.62917e-07	4.02146e-06	536	427	439	344	344	278	467.333	322
CoVb	-0.53291	6.85297	1.9092e-07	4.67906e-06	2575	2083	2013	1626	1820	1356	2223.67	1600.67
csul	-0.521406	6.38789	1.93283e-07	4.72015e-06	1790	1428	1590	1158	1254	1070	1602.67	1160.67
CG10026	-1.88306	0.183679	2.07817e-07	5.04818e-06	31	24	24	8	10	4	26.3333	7.33333
Men	-0.863395	4.32425	2.1587e-07	5.22133e-06	562	360	347	300	234	186	423	240
Cct5	-0.489787	9.28719	2.16464e-07	5.22133e-06	14323	10802	10624	9465	9349	7596	11916.3	8803.33
CG9733	-1.78982	0.438072	2.25077e-07	5.41959e-06	45	23	27	10	9	9	31.6667	9.33333
Spn55B	-0.662747	4.91748	2.2644e-07	5.44287e-06	738	531	542	464	385	336	603.667	395
CG42372	-0.707619	4.81508	2.2709e-07	5.44898e-06	591	558	540	328	423	330	563	360.333
CG30100	-0.707619	4.81508	2.2777e-07	5.45576e-06	591	558	540	328	423	330	563	360.333
alpha-Man-I	-0.519877	6.66553	2.37341e-07	5.65578e-06	2133	1852	1830	1557	1418	1254	1938.33	1409.67
CG11151	-0.536445	6.06323	2.37971e-07	5.66067e-06	1448	1132	1277	946	933	879	1285.67	919.333
RpLP0-like	-0.530071	6.91057	2.73982e-07	6.46137e-06	2475	2232	2194	1688	1867	1444	2300.33	1666.33
La	-0.473703	8.39487	2.80415e-07	6.60175e-06	7677	5656	5841	4930	5204	4178	6391.33	4770.67
CG7272	-0.636355	4.10324	2.85367e-07	6.6954e-06	395	317	304	229	239	210	338.667	226
Ssb-c31a	-0.631339	6.33587	2.95915e-07	6.90752e-06	1627	1702	1414	1052	1168	989	1581	1069.67
CG44102	-1.87488	0.291901	3.05679e-07	7.11129e-06	39	23	24	8	12	4	28.6667	8
elm	-0.560411	5.26676	3.10521e-07	7.21173e-06	848	720	664	537	570	468	744	525
nop5	-0.472833	8.62071	3.13516e-07	7.25678e-06	9059	6640	6732	5893	5906	4936	7477	5578.33
eIF-5A	-0.502528	11.2022	3.44936e-07	7.91739e-06	46856	44019	43032	33351	35070	30400	44635.7	32940.3
wun	-0.50163	5.66462	3.54059e-07	8.0863e-06	1122	856	923	744	777	609	967	710
Dbp80	-0.500347	7.99568	3.68012e-07	8.39104e-06	5147	4496	4878	3495	3700	3488	4840.33	3561
CG6726	-0.515687	5.50104	3.92539e-07	8.90597e-06	1007	787	805	639	689	560	866.333	629.333
CG9114	-0.648495	5.28711	3.97254e-07	8.9981e-06	811	699	801	453	564	516	770.333	511
CG32196	-3.25717	-0.610369	4.01689e-07	9.08359e-06	12	24	12	1	4	0	16	1.66667
CG17470	-1.12167	1.696	4.06526e-07	9.16283e-06	81	61	68	28	42	30	70	33.3333
CG8258	-0.481713	9.20133	4.28701e-07	9.59969e-06	13739	9839	10090	8848	8949	7171	11222.7	8322.67
CG7432	-0.839156	3.74582	4.38047e-07	9.77051e-06	340	284	212	154	180	150	278.667	161.333
CG11893	-2.3078	-0.261119	4.62739e-07	1.02286e-05	25	16	18	4	2	6	19.6667	4
CG13739	-1.68714	0.789341	4.64735e-07	1.02563e-05	31	45	44	10	16	13	40	13
CG10320	-0.579255	5.52795	5.12837e-07	1.12456e-05	1115	834	757	654	699	525	902	626
Pglym78	-0.504685	6.38847	6.01911e-07	1.30944e-05	1906	1379	1524	1231	1273	1012	1603	1172
CG18213	-0.636708	5.46016	6.82831e-07	1.47846e-05	917	818	862	503	629	603	865.667	578.333
Sod2	-0.515761	6.83228	7.39869e-07	1.59443e-05	2464	2081	1987	1660	1797	1314	2177.33	1590.33
CG7033	-0.446841	9.06897	7.535e-07	1.61873e-05	12135	8946	9275	7892	8201	6960	10118.7	7684.33
RpII140	-0.444075	8.41233	8.13548e-07	1.73958e-05	7044	5978	6092	5012	5147	4471	6371.33	4876.67
Drep-2	-1.41753	0.863574	8.67981e-07	1.84449e-05	51	35	36	13	18	16	40.6667	15.6667
CG5177	-1.2463	2.15724	8.74995e-07	1.85653e-05	118	100	82	28	48	54	100	43.3333
CG6788	-3.83534	-1.11024	9.28623e-07	1.96123e-05	8	15	9	0	1	1	10.6667	0.666667
CG8066	-1.29255	1.176	1.00587e-06	2.10178e-05	52	51	46	21	18	24	49.6667	21
CG10802	-0.574937	4.83187	1.02255e-06	2.13338e-05	632	483	544	385	418	353	553	385.333
Adam	-0.453687	7.31058	1.19175e-06	2.46768e-05	3357	2812	2770	2408	2417	1977	2979.67	2267.33
mbf1	-0.420608	7.37927	1.31066e-06	2.69765e-05	3521	2818	2956	2487	2553	2178	3098.33	2406
CG33491	-1.16248	3.17368	1.31594e-06	2.70446e-05	294	164	153	123	98	60	203.667	93.6667
mtg	-0.567927	5.42731	1.32615e-06	2.72139e-05	1040	705	774	680	573	504	839.667	585.667
cv-2	-0.519668	6.243	1.34864e-06	2.7634e-05	1766	1176	1433	1100	1077	973	1458.33	1050
CG32280	-0.488819	5.77668	1.37027e-06	2.80356e-05	1115	936	1058	760	836	712	1036.33	769.333
san	-0.50852	6.44985	1.40507e-06	2.86622e-05	1881	1548	1572	1248	1404	1017	1667	1223
mad2	-0.559023	6.35593	1.40951e-06	2.87101e-05	1596	1533	1590	1058	1256	1039	1573	1117.67
CG42673	-0.51506	6.26015	1.44123e-06	2.92695e-05	1759	1219	1438	1169	1053	973	1472	1065
CG9987	-0.501564	6.28927	1.60368e-06	3.22826e-05	1790	1307	1389	1177	1196	917	1495.33	1096.67
CG6115	-0.466272	6.88127	1.608e-06	3.23222e-05	2529	1996	2146	1821	1765	1441	2223.67	1675.67
CG33468	-3.32946	-0.777967	1.65614e-06	3.31444e-05	14	6	22	1	2	1	14	1.33333
CG6045	-0.599187	5.58632	1.65583e-06	3.31444e-05	987	906	911	582	652	687	934.667	640.333
Arf102F	-0.453932	7.52755	1.69162e-06	3.37562e-05	3679	3276	3399	2630	2905	2363	3451.33	2632.67
CG11985	-0.529564	5.64979	1.70335e-06	3.39412e-05	966	932	969	712	756	614	955.667	694
LSm1	-0.551923	5.30673	1.70953e-06	3.39657e-05	798	772	707	563	562	498	759	541
mRpL44	-0.520573	5.8243	1.70915e-06	3.39657e-05	1261	1062	931	777	900	684	1084.67	787
CG10344	-1.16469	2.44398	1.77281e-06	3.50205e-05	143	103	116	40	51	74	120.667	55
png	-1.69306	0.320105	1.81269e-06	3.56623e-05	31	25	29	10	6	11	28.3333	9
Traf4	-0.64676	4.5182	1.87286e-06	3.67331e-05	541	386	437	367	286	251	454.667	301.333
CG7668	-0.463263	6.9972	1.87972e-06	3.68153e-05	2618	2209	2374	1846	1914	1679	2400.33	1813
eEF1delta	-0.453821	9.11069	1.88476e-06	3.68614e-05	11466	9851	9784	8553	8543	6640	10367	7912
CG41128	-0.68953	5.80551	1.93003e-06	3.76932e-05	1005	1175	1134	644	816	703	1104.67	721
CG10205	-2.57296	-0.551332	1.95955e-06	3.82154e-05	23	9	16	5	2	1	16	2.66667
CG8451	-0.810137	3.67525	1.96569e-06	3.82809e-05	252	247	283	137	183	147	260.667	155.667
AnnX	-0.690172	4.31486	1.97601e-06	3.83764e-05	497	333	371	311	263	198	400.333	257.333
CG11555	-0.49227	5.41529	2.09828e-06	4.05756e-05	915	761	751	606	651	538	809	598.333
CG17267	-0.695646	3.35575	2.13191e-06	4.11681e-05	237	167	209	131	138	123	204.333	130.667
CG33469	-3.07536	-0.963213	2.23508e-06	4.30394e-05	12	14	9	3	1	0	11.6667	1.33333
CG3226	-0.562598	7.08872	2.25291e-06	4.3322e-05	2777	2569	2525	1712	2252	1619	2623.67	1861
CG6443	-0.575208	4.73578	2.25833e-06	4.33657e-05	564	455	529	375	404	305	516	361.333
CG10399	-0.659239	3.68982	2.51301e-06	4.77229e-05	281	241	242	160	196	148	254.667	168
CG3800	-0.433972	11.4665	2.55946e-06	4.84711e-05	60870	49151	48754	44070	42980	35285	52925	40778.3
RpS5b	-1.92636	0.103706	2.78335e-06	5.24222e-05	36	23	16	4	8	8	25	6.66667
ltd	-1.1537	2.15996	2.87603e-06	5.40938e-05	123	99	73	63	46	29	98.3333	46
Ucrh	-0.56067	7.36019	2.92762e-06	5.49138e-05	3080	3126	3244	2039	2427	2237	3150	2234.33
Prosalpha5	-0.435504	7.72597	3.02171e-06	5.65244e-05	4618	3688	3583	3302	3243	2602	3963	3049
CG1628	-0.963943	2.94662	3.05276e-06	5.70277e-05	193	123	177	111	69	81	164.333	87
ran	-0.419845	9.98644	3.19364e-06	5.93369e-05	21435	17362	17838	14780	16075	13182	18878.3	14679
Prx6005	-0.457007	5.61087	3.28766e-06	6.06739e-05	1048	827	880	697	757	631	918.333	695
His2B:CG17949	-0.709821	3.96301	3.3164e-06	6.11223e-05	347	252	340	223	181	191	313	198.333
CG33496	-1.16432	2.13774	3.47811e-06	6.35911e-05	144	70	80	58	40	36	98	44.6667
CG6405	-1.97801	-0.158299	3.52378e-06	6.41701e-05	17	20	24	5	9	2	20.3333	5.33333
l(2)35Bg	-0.467337	6.63798	3.54144e-06	6.44065e-05	2140	1784	1708	1383	1567	1286	1877.33	1412
His2B:CG33908	-0.831233	2.62691	3.62973e-06	6.5838e-05	136	114	129	91	70	61	126.333	74
Lcp65Ag1	-1.63951	0.592141	3.73186e-06	6.75788e-05	47	30	27	5	14	15	34.6667	11.3333
CG31648	-0.677872	3.41405	3.78206e-06	6.82409e-05	239	199	196	140	161	112	211.333	137.667
CG43107	-2.20006	-0.446574	3.79359e-06	6.83591e-05	20	16	14	2	6	3	16.6667	3.66667
Ssadh	-0.453425	5.68863	3.97784e-06	7.14919e-05	1133	877	899	799	769	639	969.667	735.667
CG1146	-0.559296	6.02724	4.11928e-06	7.36489e-05	1612	1061	1146	1047	903	730	1273	893.333
CG31798	-1.35848	1.64351	4.16137e-06	7.42085e-05	98	61	55	37	16	32	71.3333	28.3333
Taf12L	-1.29907	1.10396	4.29436e-06	7.62832e-05	43	55	43	19	25	16	47	20
Aats-phe	-0.52975	4.47476	4.43289e-06	7.8541e-05	480	389	407	312	342	266	425.333	306.667
CG15027	-0.616232	4.46635	4.60636e-06	8.10919e-05	470	420	406	319	341	226	432	295.333
cib	-0.47127	10.0822	4.6188e-06	8.12071e-05	23106	18782	19533	17869	15925	12486	20473.7	15426.7
CG31142	-0.440045	5.7314	4.93433e-06	8.65334e-05	1116	920	941	794	831	661	992.333	762
tipE	-2.36615	0.0598468	5.15142e-06	9.02252e-05	42	25	10	8	5	2	25.6667	5
Rpn3	-0.432283	7.75471	5.26606e-06	9.21158e-05	4787	3497	3860	3399	3347	2605	4048	3117
glob1	-0.745281	3.79479	5.5025e-06	9.56741e-05	288	273	277	156	171	192	279.333	173
CG14079	-1.51966	0.375771	5.68731e-06	9.86064e-05	31	26	29	13	11	7	28.6667	10.3333
CG42524	-3.2625	-1.1136	5.70253e-06	9.86214e-05	13	6	12	1	1	1	10.3333	1
psh	-1.61975	0.316543	5.70102e-06	9.86214e-05	38	27	19	10	10	8	28	9.33333
CG3430	-0.54906	6.05842	5.83624e-06	0.000100681	1381	1240	1221	807	1057	872	1280.67	912
Ipk1	-0.540646	5.15619	5.97773e-06	0.000102863	714	610	724	537	513	422	682.667	490.667
CG6259	-0.449894	6.3704	5.97162e-06	0.000102863	1748	1468	1435	1219	1255	1069	1550.33	1181
Taz	-0.531479	5.03777	6.19784e-06	0.00010612	727	575	589	428	522	409	630.333	453
Smyd4	-1.35822	1.07809	6.23246e-06	0.00010658	53	34	54	29	15	13	47	19
CG17119	-1.60409	0.296084	6.38761e-06	0.000109097	27	28	27	8	15	5	27.3333	9.33333
CG15529	-1.24145	1.82783	6.53703e-06	0.000111209	116	62	61	45	39	20	79.6667	34.6667
mRpS31	-0.556812	5.31237	6.54363e-06	0.000111209	798	721	772	507	648	475	763.667	543.333
mRpL36	-0.623768	4.00471	7.1444e-06	0.000120526	366	300	279	214	253	172	315	213
CG9603	-0.449514	7.78653	7.32946e-06	0.000123496	4871	3919	3663	3432	3475	2595	4151	3167.33
Su(P)	-0.571841	5.2504	7.42882e-06	0.000125017	902	693	629	540	611	406	741.333	519
CG14182	-0.570973	4.08027	7.76936e-06	0.000130429	407	285	294	244	234	208	328.667	228.667
mRpS11	-0.482284	5.9276	8.26572e-06	0.000138255	1180	1143	1109	879	919	774	1144	857.333
CG7137	-0.491172	5.16552	8.65413e-06	0.0001444	768	586	688	519	551	441	680.667	503.667
Act5C	-0.418969	12.7597	9.62823e-06	0.000159492	155674	114030	119232	110389	104464	86771	129645	100541
RpL10	-0.453054	11.8179	9.75378e-06	0.000161377	70703	67170	64346	50348	56698	47465	67406.3	51503.7
CG32409	-0.427894	6.65658	1.00536e-05	0.00016574	2246	1689	1726	1516	1556	1291	1887	1454.33
CG9586	-0.441605	5.76074	1.04994e-05	0.000172469	1130	984	922	833	821	677	1012	777
sesB	-0.424448	10.7532	1.10124e-05	0.000180465	36754	30952	28757	27064	26517	21353	32154.3	24978
CG43326	-1.01542	2.0752	1.11844e-05	0.000182847	105	76	88	33	65	40	89.6667	46
CG18600	-0.430249	5.83651	1.14187e-05	0.000186455	1210	1005	979	811	908	746	1064.67	821.667
spict	-0.473048	5.41027	1.16028e-05	0.000188566	977	681	761	605	667	532	806.333	601.333
CG10440	-0.532692	5.16737	1.16524e-05	0.000189149	839	618	620	584	487	418	692.333	496.333
mod	-0.391071	9.65691	1.19647e-05	0.00019376	16993	13818	13880	12540	12345	10559	14897	11814.7
cer	-0.561657	4.90521	1.23154e-05	0.000199205	608	559	562	377	450	394	576.333	407
Caf1	-0.394252	8.81778	1.23611e-05	0.000199709	9392	7497	8107	6517	7154	6090	8332	6587
CG5946	-0.43632	6.4035	1.26325e-05	0.000203855	1758	1464	1516	1214	1336	1096	1579.33	1215.33
CG9515	-0.748325	4.0675	1.27079e-05	0.000204832	422	355	246	204	237	190	341	210.333
CG9510	-0.748325	4.0675	1.27267e-05	0.000204894	422	355	246	204	237	190	341	210.333
beta4GalNAcTB	-0.540306	4.66304	1.28449e-05	0.000206073	555	457	447	345	336	357	486.333	346
ATPsyn-Cf6	-0.403832	7.48541	1.31397e-05	0.000210556	3868	3099	3000	2659	2905	2271	3322.33	2611.67
Eno	-0.449538	8.90774	1.31772e-05	0.000210912	11376	7672	8224	7790	7009	5843	9090.67	6880.67
CG16888	-1.53652	0.296579	1.37041e-05	0.000217824	25	25	31	9	14	6	27	9.66667
Arp1	-0.394254	7.54321	1.43514e-05	0.000227849	4087	3099	3177	2941	2882	2363	3454.33	2728.67
Vha13	-0.45314	6.66712	1.47019e-05	0.000232875	2376	1691	1695	1574	1557	1228	1920.67	1453
eIF-2alpha	-0.392089	7.65049	1.49032e-05	0.000235522	4457	3326	3383	3084	3104	2627	3722	2938.33
Arf79F	-0.386818	9.96008	1.49277e-05	0.000235635	20556	17119	17328	15306	15142	13319	18334.3	14589
CG10639	-0.557353	3.89751	1.49681e-05	0.000235735	309	267	282	217	215	176	286	202.667
Arpc2	-0.381943	7.76131	1.54733e-05	0.000243134	4636	3569	3790	3327	3297	2922	3998.33	3182
CG12883	-0.663374	3.43745	1.59413e-05	0.000249632	231	218	191	137	164	121	213.333	140.667
CG42233	-0.508535	4.62391	1.65213e-05	0.000258126	535	418	455	323	372	331	469.333	342
CG7433	-1.20671	1.12837	1.71459e-05	0.000267581	46	52	43	23	28	13	47	21.3333
Ggt-1	-0.750654	2.57042	1.73208e-05	0.000270004	131	106	120	72	73	75	119	73.3333
Tif-IA	-0.422087	7.45762	1.79828e-05	0.000279373	3346	3165	3236	2612	2634	2361	3249	2535.67
Gprk1	-0.436131	7.50805	1.81783e-05	0.000281774	3651	3057	3468	2500	2689	2619	3392	2602.67
NHP2	-0.430982	7.22343	1.88439e-05	0.000291763	3215	2594	2564	2202	2448	1821	2791	2157
usnp	-0.472862	5.40056	1.89566e-05	0.000293177	911	673	810	607	675	512	798	598
CG11737	-0.500383	4.97367	1.94665e-05	0.000299987	682	512	599	433	495	389	597.667	439
smt3	-0.398038	9.78164	2.08717e-05	0.000318143	17637	14859	16189	12807	14141	11585	16228.3	12844.3
Rpb10	-0.487228	5.85265	2.09683e-05	0.000318908	1073	1047	1137	797	905	735	1085.67	812.333
Hsp83	-0.435548	11.6453	2.1093e-05	0.00032045	66320	54377	58736	43531	54018	40781	59811	46110
CG10103	-0.442268	6.46837	2.16953e-05	0.00032743	1933	1446	1605	1367	1405	1046	1661.33	1272.67
SerT	-1.41722	1.80581	2.35295e-05	0.000352404	139	48	59	37	35	21	82	31
GstD3	-0.475293	6.24597	2.37842e-05	0.000355832	1511	1462	1303	1072	1124	1015	1425.33	1070.33
Mlc2	-0.960928	4.66665	2.38791e-05	0.000356476	550	598	470	182	349	333	539.333	288
Oscp	-0.414803	7.80556	2.38607e-05	0.000356476	5069	3762	3698	3487	3574	2697	4176.33	3252.67
otk	-0.554434	6.48219	2.39795e-05	0.000357586	2219	1404	1612	1511	1137	1030	1745	1226
P32	-0.39061	7.5893	2.44055e-05	0.000363016	4071	3354	3231	2954	3084	2429	3552	2822.33
CG9691	-0.702236	5.90111	2.53474e-05	0.000374732	1601	1050	995	1017	787	522	1215.33	775.333
CG6144	-0.509078	4.4511	2.57122e-05	0.000379311	444	386	414	301	341	270	414.667	304
kappaB-Ras	-0.529006	4.41353	2.58047e-05	0.000379859	490	355	382	314	276	288	409	292.667
CG7997	-1.483	1.62401	2.6892e-05	0.000393881	92	88	35	30	20	29	71.6667	26.3333
CG40002	-0.435666	7.80538	2.69004e-05	0.000393881	4229	4194	4016	3286	3536	2832	4146.33	3218
CG8317	-0.80305	2.32853	2.6987e-05	0.000394308	120	80	106	67	67	48	102	60.6667
CG8675	-0.506906	4.88868	2.70455e-05	0.000394743	606	547	532	426	456	357	561.667	413
CG7048	-0.438681	6.86307	2.82642e-05	0.00040992	2400	2030	2088	1740	1919	1371	2172.67	1676.67
Buffy	-1.1629	1.00015	2.88025e-05	0.000416409	54	43	31	21	20	18	42.6667	19.6667
CG42531	-2.84528	-1.11335	2.90489e-05	0.000419531	12	7	11	2	1	1	10	1.33333
CG13650	-1.11752	1.05727	3.03282e-05	0.000436175	50	33	49	22	24	17	44	21
Mlc-c	-0.372624	8.0555	3.18698e-05	0.000456912	5406	4493	4719	3975	4238	3545	4872.67	3919.33
CG3216	-1.9177	0.447605	3.20964e-05	0.00045968	53	32	13	9	7	10	32.6667	8.66667
T-cp1	-0.411947	9.31303	3.38392e-05	0.000483131	14424	10701	10481	10251	9754	7763	11868.7	9256
Tfb5	-0.426921	5.66434	3.48821e-05	0.000495448	1012	895	915	726	819	647	940.667	730.667
CG31917	-0.426921	5.66434	3.48778e-05	0.000495448	1012	895	915	726	819	647	940.667	730.667
Tsp66E	-0.456919	6.21575	3.51785e-05	0.000499143	1569	1267	1352	984	1107	1068	1396	1053
CG2124	-0.560115	3.92286	3.60219e-05	0.000509008	341	248	289	222	194	200	292.667	205.333
Zw	-0.490444	5.24222	3.66326e-05	0.000516576	880	614	670	617	541	439	721.333	532.333
CG15528	-1.35045	0.429476	3.67363e-05	0.000517085	37	23	27	13	9	13	29	11.6667
mthl5	-0.40087	7.00611	3.67865e-05	0.000517155	2773	2180	2191	2025	1976	1624	2381.33	1875
mey	-0.481039	6.53597	3.72156e-05	0.00052212	2163	1336	1812	1412	1341	1173	1770.33	1308.67
CG18522	-1.26902	0.730514	3.75193e-05	0.000525309	39	28	40	21	14	11	35.6667	15.3333
CG7294	-1.09563	1.26878	3.76287e-05	0.000526305	69	42	43	18	31	25	51.3333	24.6667
CG5367	-1.16039	1.14793	3.83236e-05	0.000534935	65	41	37	30	22	14	47.6667	22
CG32230	-0.484551	7.49652	3.92589e-05	0.000545774	3475	3628	3074	2438	2937	2265	3392.33	2546.67
capt	-0.415002	8.04568	3.97647e-05	0.000552247	5699	4124	4946	4353	3974	3194	4923	3840.33
Aats-tyr	-0.397182	7.27851	3.99721e-05	0.000554008	3442	2552	2646	2412	2402	1988	2880	2267.33
Art8	-0.424885	5.65393	4.33095e-05	0.000596089	1019	915	867	738	807	634	933.667	726.333
Tim9a	-0.453295	5.38251	4.46516e-05	0.000611469	849	783	706	599	638	544	779.333	593.667
CG17202	-0.43884	5.5793	4.46409e-05	0.000611469	1049	773	865	677	800	583	895.667	686.667
CG4038	-0.414886	6.90188	4.62637e-05	0.000631481	2330	2137	2159	1752	1866	1576	2208.67	1731.33
RpL36A	-0.383294	10.7267	4.62967e-05	0.000631481	34113	29970	29208	24914	27200	22496	31097	24870
mthl15	-1.14542	1.05576	4.64468e-05	0.000632901	43	49	40	22	17	23	44	20.6667
CG7054	-0.507373	5.18208	4.74641e-05	0.000644846	720	689	653	526	587	410	687.333	507.667
babos	-0.469135	7.10022	4.80372e-05	0.000651988	2991	2325	2463	2240	2152	1481	2593	1957.67
Rab6	-0.442288	6.67425	4.81694e-05	0.000652494	2315	1688	1759	1713	1460	1227	1920.67	1466.67
Mrp4	-1.13216	1.1541	4.95903e-05	0.000669761	55	51	36	27	17	23	47.3333	22.3333
CG5220	-0.451312	5.54696	5.11799e-05	0.000688525	912	826	878	703	745	557	872	668.333
His1:CG31617	-0.63876	3.1851	5.15347e-05	0.00069262	185	180	167	121	119	116	177.333	118.667
CG9705	-0.37368	8.43512	5.28259e-05	0.000708588	7286	5612	6182	5125	5713	4476	6360	5104.67
CG9706	-0.479953	4.45459	5.44458e-05	0.000728186	442	400	394	328	325	272	412	308.333
CG10306	-0.367056	7.81107	5.49285e-05	0.000733216	4548	3735	4037	3438	3649	2877	4106.67	3321.33
CG11089	-0.407436	7.21768	5.50191e-05	0.000733712	3336	2525	2448	2386	2220	1889	2769.67	2165
CG31381	-0.407435	7.21768	5.51182e-05	0.000734322	3336	2525	2448	2386	2220	1889	2769.67	2165
RpL15	-0.434343	11.3501	5.54511e-05	0.000736615	49701	47735	47815	35484	42050	34975	48417	37503
CG9194	-0.623217	4.87651	5.61461e-05	0.000744782	585	531	606	328	487	355	574	390
eIF-3p66	-0.363023	9.01153	5.61742e-05	0.000744782	11284	8246	8913	8145	7928	6834	9481	7635.67
Ant2	-0.498047	4.3231	5.80925e-05	0.000767903	397	356	380	278	293	265	377.667	278.667
fbp	-0.489988	6.58133	5.81415e-05	0.000767903	2130	1673	1660	1595	1465	1005	1821	1355
eIF-1A	-0.367883	8.35703	5.80564e-05	0.000767903	7092	5499	5475	5253	4987	4289	6022	4843
alphaTub84B	-0.406734	12.2872	6.21449e-05	0.000815296	115124	79161	85722	81541	75990	61155	93335.7	72895.3
tow	-1.21758	0.640544	6.2323e-05	0.000816853	37	27	35	17	14	13	33	14.6667
RpS3A	-0.424403	11.9783	6.346e-05	0.000830173	76380	73178	74281	55855	64345	54369	74613	58189.7
SmG	-0.387988	6.90019	6.43283e-05	0.000839933	2432	2045	2112	1761	1912	1573	2196.33	1748.67
nudC	-0.371417	7.48937	6.5346e-05	0.000850798	3642	3116	3105	2797	2915	2252	3287.67	2654.67
ImpL3	-1.12902	3.50483	6.5908e-05	0.000854877	339	193	230	190	107	65	254	120.667
SamDC	-0.438486	5.21959	6.61088e-05	0.000856672	784	607	696	523	562	512	695.667	532.333
CG4313	-0.593563	3.52476	6.67237e-05	0.000863827	253	220	196	143	165	152	223	153.333
mRpL12	-0.40564	5.8457	6.68993e-05	0.000865285	1308	929	973	860	937	714	1070	837
CG12560	-1.10053	1.14875	6.75277e-05	0.000871773	49	55	36	27	21	20	46.6667	22.6667
CG2641	-0.545212	4.15958	6.76907e-05	0.000872607	388	309	332	230	241	258	343	243
CG11267	-0.41897	7.50163	6.87311e-05	0.000884816	3663	3216	3199	2690	3099	2113	3359.33	2634
RpL34a	-0.355034	8.30175	7.04373e-05	0.000904241	6677	5040	5594	4786	5044	4216	5770.33	4682
CG14645	-0.605932	3.67464	7.42778e-05	0.000947352	261	243	239	182	200	130	247.667	170.667
Lcp65Ag3	-1.48462	0.364064	7.47651e-05	0.000952683	37	27	21	4	13	14	28.3333	10.3333
CG13775	-0.699108	2.89531	7.5616e-05	0.000960855	167	140	136	91	86	105	147.667	94
CG30284	-1.40338	0.37832	7.63024e-05	0.000968681	24	23	37	10	13	10	28	11
CG10383	-0.59605	4.0345	7.86166e-05	0.00099714	403	270	290	195	227	232	321	218

## Sheet: downregulated in asl
Symbol	logFC	logCPM	PValue	FDR	asl_rep1	asl_rep2	asl_rep3	yw_rep1	yw_rep2	yw_rep3	avg asl	avg yw
Cyp4p2	7.68341	7.60918	0	0	22	47	22	6245	7423	6012	30.3333	6560
Syt4	7.26869	5.94353	2.43673e-246	8.37565e-243	8	17	13	1736	2274	2134	12.6667	2048
Cyp4p1	7.48958	5.09713	5.29604e-245	1.45631e-241	7	8	3	1103	1344	990	6	1145.67
CG15236	7.38126	5.39833	1.83255e-227	4.19929e-224	7	14	3	1291	1399	1509	8	1399.67
GstZ1	6.04779	4.0824	2.16541e-180	3.72153e-177	11	6	7	605	581	488	8	558
CG31918	3.21203	6.55735	1.0641e-153	1.33003e-150	322	297	271	2676	3063	2832	296.667	2857
CHKov1	4.53456	4.8766	9.20401e-143	1.05455e-139	40	42	35	1121	929	792	39	947.333
CG6701	3.07538	6.96097	5.69175e-129	5.5897e-126	580	329	394	3820	3823	3608	434.333	3750.33
Spn42De	5.94268	2.62223	8.86006e-92	6.09085e-89	5	1	3	200	214	183	3	199
Ac3	2.98141	5.63308	2.83532e-72	1.62428e-69	180	186	172	1249	1487	1670	179.333	1468.67
CG31436	3.85178	2.67603	1.96302e-66	8.99651e-64	14	9	16	197	214	179	13	196.667
Ir76a	3.54045	4.24311	1.91054e-65	8.20875e-63	58	38	49	457	692	595	48.3333	581.333
unc-13-4A	9.91168	1.92117	2.16814e-65	9.03324e-63	0	0	0	143	108	116	0	122.333
CG32681	3.45263	2.98921	3.89819e-64	1.57636e-61	22	20	21	275	248	200	21	241
CG32686	4.27322	2.64921	6.27409e-62	2.33142e-59	13	8	8	237	183	169	9.66667	196.333
CG34215	6.68352	1.89655	6.55552e-61	2.2533e-58	2	0	1	112	119	126	1	119
CG7366	3.60996	2.96452	1.72034e-60	5.76901e-58	18	15	23	219	251	243	18.6667	237.667
CG3280	4.09358	2.34198	2.4014e-56	7.33709e-54	5	12	9	174	161	135	8.66667	156.667
hig	6.95524	1.67241	3.21037e-55	9.59551e-53	0	0	2	94	118	93	0.666667	101.667
CG40160	1.51918	7.33342	2.29918e-54	6.72582e-52	1489	1305	1261	4321	4065	3718	1351.67	4034.67
Cpr64Aa	2.40353	5.52737	3.53802e-54	1.01342e-51	245	222	242	1111	1315	1456	236.333	1294
Klp54D	7.99731	1.9124	9.04338e-54	2.48675e-51	0	1	0	158	117	90	0.333333	121.667
CHKov2	2.80678	3.32243	4.67148e-51	1.25938e-48	38	48	33	289	299	282	39.6667	290
CG7510	2.33722	4.2022	1.80785e-49	4.78003e-47	138	71	88	531	516	494	99	513.667
krimp	2.42132	3.45037	4.53044e-47	1.1535e-44	61	43	61	292	341	286	55	306.333
CG43295	3.38896	2.57463	1.53589e-46	3.83944e-44	18	15	16	163	180	191	16.3333	178
CG5830	1.38297	7.09933	1.82881e-46	4.49004e-44	1413	1101	1193	3468	3480	3086	1235.67	3344.67
CG41520	2.66763	4.13562	4.68582e-43	1.07376e-40	92	46	94	496	505	517	77.3333	506
CG2898	4.24158	1.62153	5.30536e-41	1.12221e-38	6	4	4	109	92	81	4.66667	94
CG9903	4.58771	1.34427	2.15736e-39	4.23737e-37	6	2	1	82	81	70	3	77.6667
CG16863	2.77963	2.28929	1.01589e-34	1.8875e-32	15	23	20	148	151	120	19.3333	139.667
Fps85D	1.24466	7.81926	1.19862e-33	2.16839e-31	2691	1799	2091	5483	6138	4532	2193.67	5384.33
Tequila	1.94646	3.58401	1.83466e-33	3.27595e-31	86	83	68	311	319	319	79	316.333
CG1909	2.08483	2.88951	2.05431e-33	3.62112e-31	54	39	42	196	215	184	45	198.333
asl	1.23728	6.04475	4.99256e-33	8.47441e-31	720	588	605	1549	1686	1451	637.667	1562
CG42562	5.50138	0.794121	1.4167e-30	2.23888e-28	0	1	2	50	56	52	1	52.6667
norpA	1.30114	7.02857	1.95078e-30	3.04787e-28	1473	1141	1071	3155	3002	3199	1228.33	3118.67
GstE1	1.94841	4.10673	4.90743e-30	7.58115e-28	123	96	123	384	521	464	114	456.333
sec31	1.08999	8.27556	6.89762e-30	1.05373e-27	3883	2679	3149	7704	7396	6298	3237	7132.67
CG2233	3.06976	1.61889	3.47482e-29	5.02898e-27	9	7	14	99	88	78	10	88.3333
Cpr31A	2.74723	2.01759	9.39799e-29	1.33209e-26	17	10	22	132	109	103	16.3333	114.667
CG13679	3.75509	1.19039	1.13578e-27	1.57736e-25	2	2	10	70	74	58	4.66667	67.3333
mthl10	1.15763	6.14845	1.49073e-27	2.04961e-25	820	655	664	1594	1745	1604	713	1647.67
CG10151	1.82275	2.90675	2.61117e-27	3.55456e-25	63	48	47	196	199	185	52.6667	193.333
CG7916	5.67022	0.961139	7.07063e-27	9.43826e-25	0	2	1	80	63	37	1	60
CG15905	2.26425	7.22234	1.57129e-26	2.07728e-24	1159	550	843	5882	3935	2831	850.667	4216
TwdlM	3.82158	1.13233	6.20938e-26	8.05403e-24	9	1	3	54	74	66	4.33333	64.6667
CG31705	1.42706	5.1404	6.68008e-26	8.58359e-24	360	294	275	1056	856	694	309.667	868.667
CG3837	1.14045	5.59446	3.60992e-25	4.47142e-23	586	465	419	1165	1102	1084	490	1117
dream	3.07947	1.32289	5.547e-25	6.80944e-23	8	7	9	84	69	61	8	71.3333
Ptr	2.11839	3.02293	4.01453e-24	4.79964e-22	71	40	36	245	192	218	49	218.333
CG17018	2.20783	2.1484	3.24979e-23	3.6624e-21	27	23	24	141	123	94	24.6667	119.333
swi2	1.42174	4.36159	6.65614e-23	7.44027e-21	181	166	191	461	539	501	179.333	500.333
CG33306	7.99702	0.128699	2.45147e-22	2.69642e-20	0	0	0	40	25	32	0	32.3333
CG32572	2.43859	1.78702	2.57505e-22	2.80987e-20	18	15	17	89	91	102	16.6667	94
CG31999	1.16666	4.50258	5.54001e-22	5.8592e-20	246	198	232	574	544	463	225.333	527
CG42351	4.22704	0.868795	5.50148e-22	5.8592e-20	5	0	3	67	63	33	2.66667	54.3333
Cyp4d2	1.32723	4.34954	1.95938e-21	2.02553e-19	209	168	185	441	578	448	187.333	489
CG5731	1.16401	5.55877	2.18744e-21	2.24441e-19	472	413	521	1225	1112	961	468.667	1099.33
CG14598	1.26245	4.65218	2.91235e-21	2.94425e-19	280	222	216	669	665	464	239.333	599.333
Cyp4d14	1.85675	3.20216	3.21306e-21	3.22455e-19	54	60	75	219	262	236	63	239
CG8997	4.61579	0.347063	5.71196e-21	5.60955e-19	2	2	0	46	35	30	1.33333	37
CG9747	1.39709	4.79121	6.72371e-21	6.55634e-19	302	195	246	765	758	513	247.667	678.667
CG13654	3.90707	0.587973	8.85997e-21	8.51858e-19	3	3	2	54	37	39	2.66667	43.3333
Pde9	1.66046	4.88187	1.4296e-20	1.35555e-18	295	142	258	865	754	644	231.667	754.333
phr	0.976473	6.89314	3.12029e-20	2.91842e-18	1396	1197	1297	2525	3003	2452	1296.67	2660
ltl	0.923679	6.83527	1.09368e-19	9.95826e-18	1437	1080	1326	2640	2591	2336	1281	2522.33
SPE	1.89126	2.35216	1.4767e-19	1.33573e-17	47	29	27	154	136	107	34.3333	132.333
CG33978	0.87443	9.18581	2.30086e-19	2.06762e-17	7096	6074	6802	12658	13356	12118	6657.33	12710.7
CG6231	1.83394	2.15204	3.63294e-19	3.22254e-17	39	25	28	113	115	112	30.6667	113.333
Arr2	2.48631	1.3421	3.96908e-19	3.49814e-17	11	14	10	77	67	62	11.6667	68.6667
CG5590	0.92195	6.46523	4.9958e-19	4.3473e-17	1111	909	951	2127	2117	1631	990.333	1958.33
CG34411	3.23228	2.28874	5.37341e-19	4.64648e-17	19	10	15	217	145	75	14.6667	145.667
IntS12	1.1605	4.52783	5.49352e-19	4.72065e-17	272	192	229	496	612	497	231	535
CG13045	2.57303	1.73224	7.47922e-19	6.38707e-17	15	17	12	116	100	61	14.6667	92.3333
Dscam	1.05721	6.32246	7.65156e-19	6.49391e-17	1035	723	786	2174	1718	1587	848	1826.33
Cap-H2	1.02468	7.25383	1.02001e-18	8.60374e-17	1763	1474	1652	3120	3650	3542	1629.67	3437.33
l(2)34Fc	1.53193	2.95747	1.14153e-18	9.57005e-17	64	65	61	179	210	184	63.3333	191
CG15080	1.73972	3.75711	1.57684e-18	1.31394e-16	132	107	63	343	348	348	100.667	346.333
CG13685	2.13125	2.3339	1.81145e-18	1.49136e-16	40	28	21	163	109	131	29.6667	134.333
CG13284	2.50656	1.72663	2.14655e-18	1.75672e-16	17	14	15	109	68	95	15.3333	90.6667
HPS4	0.90572	5.43745	2.30443e-18	1.86374e-16	560	450	457	978	974	899	489	950.333
Cpr66D	1.21027	4.31468	2.4088e-18	1.93676e-16	241	147	197	447	511	439	195	465.667
CG42561	2.80552	0.976023	2.78391e-18	2.22535e-16	6	8	8	52	54	56	7.33333	54
CG18577	7.77445	-0.0577187	4.16686e-18	3.27372e-16	0	0	0	26	41	17	0	28
CG8172	2.54473	1.38441	4.60786e-18	3.59963e-16	15	12	8	61	91	62	11.6667	71.3333
CG4382	1.30198	6.77572	5.79844e-18	4.50411e-16	1236	748	1117	3322	2551	2064	1033.67	2645.67
Gyc-89Da	3.03749	0.654626	2.92711e-17	2.19919e-15	7	2	6	42	43	45	5	43.3333
magu	0.750693	8.07073	4.28906e-17	3.15349e-15	3804	2938	3052	5742	6091	5253	3264.67	5695.33
CG32850	0.901649	5.62483	4.43904e-17	3.2464e-15	616	513	542	1024	1237	989	557	1083.33
CG4984	1.45361	2.89987	6.43114e-17	4.65378e-15	84	48	60	175	195	173	64	181
CG17816	1.31105	3.65796	1.07749e-16	7.75624e-15	127	100	122	357	282	263	116.333	300.667
Faa	1.76957	2.10683	1.93803e-16	1.3735e-14	35	26	31	96	123	107	30.6667	108.667
Obp56a	1.89901	3.5947	2.94138e-16	2.0739e-14	65	96	80	401	327	231	80.3333	319.667
CG17600	0.939707	4.59193	4.11452e-16	2.8571e-14	315	240	248	532	581	485	267.667	532.667
Muc68Ca	2.27725	1.86815	4.18281e-16	2.88992e-14	19	23	16	122	75	97	19.3333	98
Cht5	1.75896	5.4292	5.52297e-16	3.79677e-14	425	207	336	1610	1009	770	322.667	1129.67
CG13890	0.88741	5.24043	9.91661e-16	6.6509e-14	457	393	435	850	899	732	428.333	827
Sema-1a	1.38841	4.64887	1.03066e-15	6.87893e-14	294	200	184	747	493	584	226	608
CG14997	0.764088	6.90082	1.13599e-15	7.50903e-14	1615	1320	1378	2651	2672	2297	1437.67	2540
CG32248	4.87396	-0.214233	1.91861e-15	1.25614e-13	0	0	2	27	27	18	0.666667	24
CG31547	1.48985	2.82738	2.11386e-15	1.37742e-13	67	50	61	149	202	168	59.3333	173
CG6357	1.96896	4.20438	2.17723e-15	1.41201e-13	153	82	130	702	487	302	121.667	497
CG7328	1.86392	1.80495	2.96044e-15	1.90202e-13	23	24	23	107	86	74	23.3333	89
rut	0.979471	5.65034	3.32463e-15	2.12607e-13	736	478	448	1268	1121	985	554	1124.67
CG31076	2.97198	0.764191	5.33052e-15	3.39302e-13	6	6	5	39	43	58	5.66667	46.6667
Ir85a	2.32457	1.04674	5.36922e-15	3.40191e-13	10	11	10	62	50	51	10.3333	54.3333
InR	0.806754	6.54073	8.35446e-15	5.245e-13	1225	1016	1054	2263	1970	1770	1098.33	2001
Tsp	0.865428	6.744	1.4603e-14	9.04399e-13	1513	1009	1203	2679	2438	1920	1241.67	2345.67
CG10089	1.40309	2.90414	2.49654e-14	1.51211e-12	79	49	69	212	166	162	65.6667	180
Kebab	0.901409	4.5893	2.62355e-14	1.58207e-12	303	231	280	536	553	490	271.333	526.333
Mal-B2	2.22311	1.58308	4.33592e-14	2.56959e-12	20	16	13	57	100	81	16.3333	79.3333
spen	1.0351	8.00228	5.77208e-14	3.39147e-12	3617	2526	2141	6994	5183	5280	2761.33	5819
CG42238	1.19181	7.42351	6.13409e-14	3.58883e-12	1558	1355	2132	3650	4501	3916	1681.67	4022.33
Nf1	0.90404	6.12178	1.28917e-13	7.47879e-12	1003	705	671	1700	1414	1467	793	1527
toe	0.936086	5.16514	1.99917e-13	1.14527e-11	454	314	431	786	912	687	399.667	795
CG13516	1.50856	3.5651	2.18861e-13	1.2486e-11	75	109	107	284	329	264	97	292.333
Gasp	0.797846	7.47621	2.43228e-13	1.37619e-11	2240	2058	2009	3470	4100	3835	2102.33	3801.67
Gbs-76A	0.832847	5.24934	2.80078e-13	1.57819e-11	563	376	400	890	840	733	446.333	821
vkg	0.882766	6.0168	2.97963e-13	1.67212e-11	969	684	583	1451	1458	1333	745.333	1414
GABA-B-R2	0.985699	4.06168	3.22623e-13	1.79838e-11	217	173	153	360	392	361	181	371
CG1674	1.30732	3.40949	3.23078e-13	1.79838e-11	128	82	86	314	232	212	98.6667	252.667
ana2	0.893969	5.29738	5.11219e-13	2.78919e-11	490	409	436	767	1007	807	445	860.333
l(3)neo38	0.969167	6.61083	5.43134e-13	2.92845e-11	1456	968	834	2466	2061	2017	1086	2181.33
LRP1	0.876594	7.54448	5.59184e-13	3.00321e-11	2658	1776	2031	5060	3815	3410	2155	4095
CG42272	0.79598	4.6876	5.69264e-13	3.04545e-11	340	281	292	565	585	499	304.333	549.667
Cda5	1.72688	4.15548	5.97497e-13	3.1841e-11	162	158	80	376	474	514	133.333	454.667
CheB42c	1.31837	2.88062	8.96953e-13	4.72498e-11	80	58	64	197	150	174	67.3333	173.667
CG42326	2.7742	1.73855	1.03729e-12	5.40218e-11	11	17	11	53	135	94	13	94
Cyp304a1	7.15686	-0.594169	1.45439e-12	7.51742e-11	0	0	0	10	25	19	0	18
CG1600	1.01607	6.89567	2.21229e-12	1.13073e-10	1384	964	1491	2594	2581	2838	1279.67	2671
CG4829	2.14177	2.08942	2.24398e-12	1.14268e-10	42	15	18	153	110	78	25	113.667
debcl	0.797485	5.46989	2.44087e-12	1.23381e-10	610	419	550	954	1050	843	526.333	949
CG17684	1.72357	2.08131	2.69794e-12	1.35875e-10	28	22	42	103	129	87	30.6667	106.333
dtr	1.62731	1.76237	2.88059e-12	1.43497e-10	23	30	24	81	89	79	25.6667	83
modSP	0.74467	6.83802	3.06353e-12	1.52059e-10	1747	1213	1237	2644	2609	2029	1399	2427.33
Ten-a	0.928565	7.76076	4.68774e-12	2.3101e-10	3328	2093	1964	5773	4529	4135	2461.67	4812.33
CG9628	1.07151	6.67731	7.49103e-12	3.63937e-10	1162	814	1238	2976	2323	1771	1071.33	2356.67
grass	1.12912	3.00137	8.43945e-12	4.0857e-10	84	72	84	179	211	158	80	182.667
CG9902	0.814491	5.41532	9.15306e-12	4.41563e-10	567	480	456	995	838	906	501	913
CG42259	1.05171	3.61874	9.3067e-12	4.47405e-10	139	108	138	268	275	284	128.333	275.667
CG31414	1.64597	1.87586	9.49999e-12	4.55106e-10	29	29	25	111	75	85	27.6667	90.3333
Fuca	1.18129	2.86458	9.74108e-12	4.65035e-10	78	57	78	191	167	145	71	167.667
kn	0.782976	5.03791	1.26774e-11	5.98975e-10	455	323	398	725	754	621	392	700
CG2064	0.968769	3.75083	1.36873e-11	6.44475e-10	148	145	144	296	310	286	145.667	297.333
CG33307	3.29305	-0.0849221	1.54221e-11	7.18776e-10	1	4	2	26	29	20	2.33333	25
CG32368	3.84343	-0.299497	1.64147e-11	7.62449e-10	0	1	3	20	27	18	1.33333	21.6667
eyg	0.752524	5.27484	2.50619e-11	1.13722e-09	563	392	453	849	920	693	469.333	820.667
CG10359	0.622119	7.39492	3.25293e-11	1.46638e-09	2408	1944	2106	3818	3654	2899	2152.67	3457
MED7	0.725995	5.90165	3.36523e-11	1.51204e-09	814	632	746	1197	1450	1126	730.667	1257.67
pwn	0.604521	7.48755	4.30807e-11	1.92937e-09	2772	2093	2102	3655	3836	3462	2322.33	3651
Nrt	1.06875	6.48208	4.89381e-11	2.1635e-09	1204	682	956	2697	1885	1581	947.333	2054.33
ft	0.646892	8.97808	5.21282e-11	2.29715e-09	7892	5664	5733	11163	10122	9853	6429.67	10379.3
Toll-9	2.51965	0.241832	5.85519e-11	2.57198e-09	7	2	6	35	30	26	5	30.3333
Msp-300	0.775805	9.53279	5.96044e-11	2.60988e-09	11130	8165	7524	18227	14197	14890	8939.67	15771.3
CG16947	0.866352	4.07116	6.16772e-11	2.69206e-09	214	161	201	357	408	327	192	364
CG1503	4.38842	-0.615238	6.38047e-11	2.77611e-09	0	0	2	18	14	19	0.666667	17
rg	0.86496	6.95235	6.56014e-11	2.84528e-09	1827	1276	1210	3347	2495	2277	1437.67	2706.33
CG42598	1.31305	2.49551	6.60372e-11	2.85517e-09	62	48	44	165	121	112	51.3333	132.667
NFAT	0.754136	6.53914	7.33859e-11	3.15307e-09	1377	975	1039	2261	1789	1851	1130.33	1967
Cpr65Ec	2.48616	2.22212	7.61599e-11	3.26206e-09	26	20	20	217	112	63	22	130.667
CG9812	1.26182	3.22991	7.91166e-11	3.37818e-09	109	69	88	271	238	156	88.6667	221.667
l(2)41Ab	1.14988	2.4566	8.22209e-11	3.49986e-09	61	50	51	129	132	113	54	124.667
CG5281	2.16885	0.579919	8.83621e-11	3.71526e-09	10	6	8	33	41	39	8	37.6667
Gyc-89Db	3.93673	-0.551387	9.00684e-11	3.77546e-09	2	0	1	18	17	18	1	17.6667
CG34120	1.07175	4.43581	9.15335e-11	3.82521e-09	326	194	166	536	497	444	228.667	492.333
chp	0.837373	4.06745	9.73098e-11	4.05428e-09	237	175	172	368	404	311	194.667	361
TfIIFbeta	0.688544	6.03111	9.83483e-11	4.08517e-09	948	698	798	1345	1543	1202	814.667	1363.33
CG14257	1.52062	5.42633	1.02453e-10	4.24286e-09	532	216	356	1518	1047	691	368	1085.33
CG3368	0.625355	6.74746	1.05799e-10	4.36824e-09	1618	1265	1244	2281	2298	2021	1375.67	2200
CG13676	0.741778	8.28656	1.08818e-10	4.47946e-09	5101	3208	3233	7398	6622	5813	3847.33	6611
Idh	0.645488	9.10071	1.15006e-10	4.70601e-09	8399	5955	6638	12859	11798	9426	6997.33	11361
Drip	0.835119	4.85855	1.34717e-10	5.49622e-09	429	308	281	691	636	551	339.333	626
CG13907	2.09468	0.82163	1.36126e-10	5.53725e-09	11	13	6	48	38	48	10	44.6667
CG43867	0.896931	4.86753	1.65285e-10	6.68384e-09	433	309	256	695	647	575	332.667	639
CG34431	1.32123	2.21392	1.66792e-10	6.72499e-09	55	37	34	116	98	111	42	108.333
CG13678	2.89716	0.361403	2.1911e-10	8.7574e-09	3	1	9	24	43	36	4.33333	34.3333
CG6401	0.870113	3.89489	3.11052e-10	1.22892e-08	200	159	150	367	331	270	169.667	322.667
Meltrin	1.21845	5.79853	3.12362e-10	1.23056e-08	737	434	478	1898	1170	904	549.667	1324
mim	0.758757	6.11458	3.22286e-10	1.26603e-08	1033	667	824	1719	1447	1252	841.333	1472.67
salr	0.555674	8.13531	4.24204e-10	1.65223e-08	4376	3288	3473	5938	5931	5100	3712.33	5656.33
GstT3	0.90882	4.32968	4.6208e-10	1.7714e-08	249	178	250	409	509	403	225.667	440.333
stan	0.728549	7.37618	5.09939e-10	1.94215e-08	2630	1813	1708	4136	3310	3065	2050.33	3503.67
CG42361	1.29606	2.493	5.17653e-10	1.96608e-08	71	49	36	125	131	138	52	131.333
Ada2a	0.685859	6.46053	5.36607e-10	2.03246e-08	1122	1056	1089	1777	2042	1679	1089	1832.67
trx	0.632407	8.00922	5.63901e-10	2.12413e-08	3900	2972	3011	6085	4983	4802	3294.33	5290
CG15011	0.640071	5.59536	6.5205e-10	2.43615e-08	712	562	567	1096	1058	833	613.667	995.667
l(3)72Dr	4.95794	-0.806539	7.05596e-10	2.62906e-08	0	1	0	11	22	11	0.333333	14.6667
CG31475	0.753697	5.10166	7.12906e-10	2.64912e-08	525	352	374	710	744	716	417	723.333
Pkc98E	0.677312	5.79368	7.25619e-10	2.68187e-08	904	564	630	1242	1182	1031	699.333	1151.67
Tsp96F	0.632802	5.86395	7.71121e-10	2.8348e-08	827	734	657	1189	1248	1138	739.333	1191.67
tobi	3.27095	-0.283559	8.99539e-10	3.24613e-08	2	3	1	28	24	12	2	21.3333
B4	0.619606	6.7461	9.30094e-10	3.34761e-08	1526	1290	1301	2202	2213	2149	1372.33	2188
CG10623	0.965319	3.49396	1.07356e-09	3.81406e-08	128	117	121	286	269	194	122	249.667
CG34398	0.754829	7.31807	1.17277e-09	4.15579e-08	2548	1688	1615	4010	3202	2954	1950.33	3388.67
CG13053	2.29962	2.30859	1.28721e-09	4.53791e-08	36	20	23	217	132	60	26.3333	136.333
rasp	0.581067	5.83773	1.33686e-09	4.7009e-08	834	683	712	1245	1218	1010	743	1157.67
CG8129	1.39312	3.26929	1.58379e-09	5.48501e-08	109	69	79	167	314	216	85.6667	232.333
CG11253	0.843867	3.47674	1.65892e-09	5.73079e-08	138	117	128	242	248	225	127.667	238.333
Rbp1-like	0.631278	6.60103	1.79311e-09	6.17882e-08	1374	1175	1155	2200	2160	1638	1234.67	1999.33
Tie	0.88348	5.20185	1.83374e-09	6.28732e-08	445	407	400	667	853	873	417.333	797.667
gukh	0.578932	7.40752	1.89266e-09	6.44115e-08	2673	1870	2129	3845	3416	3053	2224	3438
CG14102	1.08774	3.88867	2.13114e-09	7.21701e-08	189	133	138	266	421	323	153.333	336.667
CG42863	0.687289	5.56014	2.27703e-09	7.69211e-08	724	493	552	1098	916	924	589.667	979.333
hbs	0.951274	5.87182	2.38329e-09	8.03135e-08	881	513	575	1713	1209	1004	656.333	1308.67
Spn47C	0.853049	4.23269	2.56385e-09	8.59673e-08	222	190	234	374	446	395	215.333	405
Orco	6.6697	-0.992431	2.56983e-09	8.59673e-08	0	0	0	11	8	19	0	12.6667
tam	0.711333	4.9571	3.14087e-09	1.04309e-07	483	322	347	697	686	567	384	650
esn	0.699588	6.78026	3.7728e-09	1.24096e-07	1723	1019	1380	2509	2403	1992	1374	2301.33
stwl	0.657409	5.43975	3.92584e-09	1.28822e-07	659	513	471	961	877	843	547.667	893.667
Cap-D3	0.619473	5.46349	4.46923e-09	1.45956e-07	615	505	569	905	936	856	563	899
heph	0.614147	9.42921	4.52538e-09	1.47439e-07	11351	7841	7617	14982	13876	13340	8936.33	14066
Cg25C	0.79951	6.3471	4.68268e-09	1.51488e-07	1334	868	730	1843	1743	1640	977.333	1742
CG42540	3.57396	-0.528452	4.91893e-09	1.58255e-07	2	0	2	12	17	24	1.33333	17.6667
CG9447	2.27757	0.553708	5.05653e-09	1.62056e-07	5	5	12	40	28	44	7.33333	37.3333
CG30047	1.41867	1.79457	5.52673e-09	1.76304e-07	28	32	28	71	84	90	29.3333	81.6667
Ir51b	0.882018	3.37714	5.83054e-09	1.85136e-07	119	115	116	237	248	190	116.667	225
Mnn1	0.606181	7.16247	6.29174e-09	1.99321e-07	2233	1573	1759	3314	2846	2605	1855	2921.67
Snoo	0.682743	5.35227	6.68304e-09	2.10263e-07	636	448	450	960	810	773	511.333	847.667
CG32111	0.58235	6.24047	6.75405e-09	2.12012e-07	1098	881	968	1543	1628	1415	982.333	1528.67
rdo	0.76521	6.5181	7.26893e-09	2.27655e-07	1390	876	1070	2393	1962	1521	1112	1958.67
mas	0.582934	7.36169	7.4116e-09	2.31596e-07	2661	1960	1836	3711	3319	2971	2152.33	3333.67
Sb	1.02599	5.76905	7.59988e-09	2.3694e-07	796	409	569	1636	1229	866	591.333	1243.67
CG7044	0.619016	5.76457	7.96922e-09	2.47893e-07	717	632	727	1168	1218	952	692	1112.67
CG13531	0.560261	5.80672	9.20846e-09	2.84075e-07	839	687	676	1213	1131	1029	734	1124.33
Cyp9b1	4.7194	-0.994092	9.21505e-09	2.84075e-07	0	0	1	10	14	13	0.333333	12.3333
CG14321	6.64714	-0.995156	9.18466e-09	2.84075e-07	0	0	0	6	21	11	0	12.6667
sima	0.596121	7.60157	1.03017e-08	3.16158e-07	3219	2203	2183	4275	3846	3707	2535	3942.67
Sema-2b	0.637696	7.81354	1.08101e-08	3.30285e-07	3599	2564	2481	5457	4388	4052	2881.33	4632.33
pk	0.728581	5.80639	1.16736e-08	3.5509e-07	828	515	720	1384	1204	957	687.667	1181.67
CG11486	0.609032	6.97298	1.18576e-08	3.59891e-07	1920	1411	1535	2972	2492	2234	1622	2566
Skeletor	0.602646	6.59256	1.24679e-08	3.76751e-07	1461	1164	1115	2196	1877	1814	1246.67	1962.33
danr	3.39374	-0.413488	1.36135e-08	4.08673e-07	5	0	0	28	19	11	1.66667	19.3333
Cyp12a5	1.96832	0.438497	1.53962e-08	4.61181e-07	6	8	10	37	32	30	8	33
dp	0.657498	8.81922	1.55374e-08	4.64398e-07	5674	4336	4561	5058	5027	4537	4857	4874
CG16824	1.90353	0.591846	1.60762e-08	4.7946e-07	7	9	12	32	39	39	9.33333	36.6667
Dl	0.859759	6.59575	1.62902e-08	4.84791e-07	1543	1007	843	2550	1876	1888	1131	2104.67
CG14441	0.887428	3.85343	1.6845e-08	5.00221e-07	205	136	152	325	282	330	164.333	312.333
CG5758	1.07953	7.31159	1.86014e-08	5.48822e-07	2260	1186	1607	5129	3453	2458	1684.33	3680
seq	0.831797	4.65515	1.98933e-08	5.85681e-07	386	258	243	655	506	468	295.667	543
Gld	0.942404	4.46923	2.03769e-08	5.98637e-07	268	199	267	627	479	370	244.667	492
CG34355	1.02747	4.24578	2.09169e-08	6.11885e-07	242	157	208	569	383	334	202.333	428.667
LpR2	0.671442	7.70113	2.28152e-08	6.63184e-07	3487	2315	2115	4949	4305	3728	2639	4327.33
CG31211	0.531929	7.79148	2.36379e-08	6.82769e-07	3219	2543	3059	4588	4597	4081	2940.33	4422
CG43986	1.13504	2.34475	2.38867e-08	6.87893e-07	71	41	40	129	107	108	50.6667	114.667
Ir40a	4.67422	-1.02399	2.39154e-08	6.87893e-07	0	1	0	9	17	10	0.333333	12
CG18853	0.628653	6.32046	2.55117e-08	7.32277e-07	1057	969	1014	1539	1842	1528	1013.33	1636.33
CG3339	6.47431	-1.11693	2.59352e-08	7.4288e-07	0	0	0	14	16	4	0	11.3333
CG2225	0.544959	6.58884	2.64854e-08	7.57065e-07	1438	1151	1225	1984	1944	1843	1271.33	1923.67
Adgf-A	1.53231	1.23857	2.70775e-08	7.70783e-07	28	12	16	51	70	47	18.6667	56
CG16791	0.565586	7.37055	3.10551e-08	8.78553e-07	2749	1798	2015	3757	3343	2922	2187.33	3340.67
arr	0.570557	8.48868	3.232e-08	9.11461e-07	6027	4041	4160	7926	7173	6652	4742.67	7250.33
CG42748	0.629253	8.33359	3.26874e-08	9.17182e-07	5337	3692	3440	7481	6287	6079	4156.33	6615.67
CG3328	0.61795	7.03351	3.43074e-08	9.58725e-07	2183	1431	1474	2991	2665	2386	1696	2680.67
kst	0.570611	9.10018	3.4547e-08	9.63462e-07	8631	6199	6814	12743	10397	10099	7214.67	11079.7
CG1698	0.740345	3.93529	3.50166e-08	9.74581e-07	203	170	180	361	336	267	184.333	321.333
tai	0.593965	6.71123	3.70055e-08	1.02785e-06	1704	1162	1233	2280	2043	2044	1366.33	2122.33
CG41284	1.10109	2.44638	3.71372e-08	1.02944e-06	67	50	48	153	113	102	55	122.667
uif	0.610874	9.34794	3.7352e-08	1.03331e-06	10744	7276	7363	14811	12367	12655	8461	13277.7
CG33255	0.678919	4.35923	3.88073e-08	1.06926e-06	274	255	233	451	435	386	254	424
CG16700	0.892704	5.01508	4.23359e-08	1.16183e-06	400	306	393	604	684	812	366.333	700
LanB1	0.50692	9.21528	4.26368e-08	1.16776e-06	9433	7258	7325	12665	11718	10953	8005.33	11778.7
CG14372	0.959353	4.39136	4.36979e-08	1.19207e-06	313	192	193	591	467	346	232.667	468
CG2950	0.546431	5.96468	4.71812e-08	1.27696e-06	986	708	787	1292	1276	1178	827	1248.67
hang	0.600777	7.93003	4.84933e-08	1.30732e-06	3934	2903	2672	5479	4616	4761	3169.67	4952
wts	0.589533	6.3889	4.90375e-08	1.31941e-06	1329	936	1012	1891	1626	1575	1092.33	1697.33
Nep3	2.50909	-0.264664	5.04135e-08	1.35378e-06	4	3	3	26	19	16	3.33333	20.3333
dpr6	4.59371	-1.08518	5.55219e-08	1.48227e-06	1	0	0	14	13	7	0.333333	11.3333
mle	0.541847	7.09717	5.75911e-08	1.53157e-06	2047	1564	1827	2977	2751	2494	1812.67	2740.67
dac	0.6563	4.472	6.05813e-08	1.60798e-06	322	231	284	499	462	408	279	456.333
CG3568	0.922096	4.08816	6.24011e-08	1.65205e-06	260	126	190	376	420	325	192	373.667
Dll	0.555055	5.70272	6.61222e-08	1.73827e-06	828	567	668	1139	1082	918	687.667	1046.33
CG31462	2.01894	0.414913	7.11055e-08	1.86571e-06	10	9	4	45	26	27	7.66667	32.6667
obst-A	0.503852	7.35418	7.43455e-08	1.9433e-06	2568	1890	2157	3336	3212	3146	2205	3231.33
tud	0.572254	8.48896	7.83293e-08	2.04355e-06	5721	4310	4125	8104	6721	6900	4718.67	7241.67
CG1139	2.19165	0.287582	7.98416e-08	2.07513e-06	12	4	3	42	28	21	6.33333	30.3333
CG3530	0.592737	5.43604	8.03885e-08	2.08147e-06	693	450	547	924	919	790	563.333	877.667
CG9503	1.24646	4.11523	8.08887e-08	2.08736e-06	215	126	160	600	359	276	167	411.667
Cad74A	0.517966	8.15813	8.74347e-08	2.2428e-06	4511	3535	3437	6317	5539	5187	3827.67	5681
CG34380	0.700326	6.395	8.90302e-08	2.27947e-06	1313	827	1010	2153	1745	1402	1050	1766.67
Tl	0.577303	6.23972	9.58697e-08	2.44548e-06	1172	858	934	1723	1460	1395	988	1526
Smr	0.590001	7.10347	9.83702e-08	2.50462e-06	2245	1523	1624	3076	2628	2649	1797.33	2784.33
TwdlT	3.05963	2.04013	1.00465e-07	2.55322e-06	19	9	13	241	91	31	13.6667	121
BoYb	2.18365	0.217012	1.03246e-07	2.61424e-06	9	4	5	20	41	25	6	28.6667
br	1.14664	7.23866	1.16933e-07	2.95536e-06	2368	1264	1060	4921	2998	2683	1564	3534
CG43117	1.92561	0.292467	1.18809e-07	2.99725e-06	7	9	6	29	31	28	7.33333	29.3333
Atet	0.959805	3.84141	1.19557e-07	3.01061e-06	207	125	142	386	346	225	158	319
5-HT1A	4.50828	-1.14668	1.2504e-07	3.14291e-06	0	0	1	10	13	9	0.333333	10.6667
E(spl)m2-BFM	0.593716	5.70527	1.27414e-07	3.19093e-06	719	610	688	1123	1214	852	672.333	1063
ewg	0.507768	7.09508	1.55257e-07	3.85311e-06	2109	1684	1714	2714	2833	2571	1835.67	2706
pip	1.44533	2.92655	1.65392e-07	4.07523e-06	88	43	66	273	158	125	65.6667	185.333
Cyp4p3	6.46738	-1.11711	1.76185e-07	4.3334e-06	0	0	0	19	12	3	0	11.3333
Cyp6a2	3.48751	-0.883779	1.9071e-07	4.67906e-06	0	0	3	17	12	10	1	13
tun	0.524318	6.23992	1.9156e-07	4.6864e-06	1176	906	943	1569	1518	1419	1008.33	1502
wech	0.877397	4.46682	1.95273e-07	4.7603e-06	344	224	196	558	414	466	254.667	479.333
fs(1)h	0.589628	7.9078	1.95621e-07	4.76035e-06	4044	2728	2668	5452	4539	4603	3146.67	4864.67
rst	0.542382	6.18992	2.15351e-07	5.22133e-06	1158	848	900	1602	1554	1238	968.667	1464.67
Ten-m	0.700582	7.63412	2.16445e-07	5.22133e-06	3324	2186	1960	4943	3732	3781	2490	4152
Cpr51A	0.749069	4.45718	2.31119e-07	5.52636e-06	310	281	203	484	478	425	264.667	462.333
RhoBTB	0.487022	7.20462	2.37355e-07	5.65578e-06	2264	1817	1907	2975	3026	2712	1996	2904.33
CG10657	0.650512	4.4574	2.48062e-07	5.88035e-06	325	262	243	513	457	385	276.667	451.667
dnr1	0.721992	4.28522	2.47702e-07	5.88035e-06	295	197	225	366	442	410	239	406
CG42322	1.8433	0.230298	2.64508e-07	6.25941e-06	9	6	7	32	28	23	7.33333	27.6667
gig	0.51166	6.47013	2.66637e-07	6.29895e-06	1391	1099	1077	1874	1794	1607	1189	1758.33
CG31068	1.14833	2.37685	2.81074e-07	6.60596e-06	66	51	37	134	97	121	51.3333	117.333
Ddr	1.05909	3.40932	2.88632e-07	6.76048e-06	162	99	75	283	223	212	112	239.333
grh	0.617225	7.94886	2.90754e-07	6.79861e-06	4186	2615	2821	5956	4703	4508	3207.33	5055.67
mbl	0.534331	6.48922	3.00838e-07	7.01054e-06	1434	1085	1069	1971	1751	1655	1196	1792.33
inaE	0.619995	5.02083	3.13332e-07	7.25678e-06	528	366	358	655	706	623	417.333	661.333
CG34247	3.56935	0.136917	3.15936e-07	7.30051e-06	4	1	2	61	18	12	2.33333	30.3333
Haspin	0.618686	6.2369	3.28312e-07	7.57377e-06	953	920	1000	1513	1543	1547	957.667	1534.33
Ac13E	0.8498	3.5167	3.39766e-07	7.81177e-06	175	106	116	293	231	214	132.333	246
CG30392	0.611232	4.58733	3.47563e-07	7.96441e-06	329	284	307	477	544	444	306.667	488.333
CG3902	0.564457	6.89882	3.50142e-07	8.01016e-06	1963	1412	1348	2725	2493	2017	1574.33	2411.67
Fs	0.517707	5.54146	3.77633e-07	8.59616e-06	698	558	607	1001	970	806	621	925.667
shn	0.510626	7.14969	3.86938e-07	8.79339e-06	2268	1766	1691	3034	2775	2633	1908.33	2814
unc	1.00643	2.51015	4.0243e-07	9.0854e-06	54	53	72	122	134	120	59.6667	125.333
CycT	0.603597	6.42462	4.13294e-07	9.30012e-06	1444	993	915	1967	1739	1545	1117.33	1750.33
nej	0.783215	6.50613	4.21958e-07	9.46412e-06	1454	978	859	2401	1610	1800	1097	1937
mthl3	0.478685	8.3843	4.30711e-07	9.62902e-06	5125	4308	4171	6422	6931	6321	4534.67	6558
mira	1.53866	0.865143	4.38461e-07	9.77051e-06	17	13	12	48	51	29	14	42.6667
cic	0.503178	8.30445	4.42108e-07	9.83583e-06	5219	3762	3847	6775	5995	5976	4276	6248.67
mwh	1.14096	2.1136	4.4494e-07	9.88285e-06	42	39	46	78	117	97	42.3333	97.3333
LanA	0.482596	9.71414	4.46983e-07	9.91221e-06	13485	10190	10614	17762	15960	15799	11429.7	16507
CG15312	1.82434	0.32861	4.55704e-07	1.00893e-05	8	7	9	31	25	33	8	29.6667
CG10924	0.937797	2.72447	4.67434e-07	1.02993e-05	69	77	69	133	164	134	71.6667	143.667
wit	0.518929	6.55013	4.77945e-07	1.0514e-05	1550	1052	1176	2011	1875	1702	1259.33	1862.67
CG14964	1.52239	1.09193	4.84169e-07	1.06339e-05	15	19	16	38	56	56	16.6667	50
gpp	0.577867	7.15152	5.27847e-07	1.15514e-05	2322	1513	1770	3383	2799	2463	1868.33	2881.67
Tsp74F	0.602439	5.15893	5.28465e-07	1.15514e-05	488	401	486	744	714	711	458.333	723
sm	2.63194	1.83033	5.93887e-07	1.29609e-05	21	10	15	202	55	43	15.3333	100
Proc-R	3.1804	-0.195687	5.95705e-07	1.29799e-05	4	2	1	8	34	26	2.33333	22.6667
cora	0.500919	9.28292	6.13538e-07	1.33263e-05	10200	7206	7896	13214	11732	11947	8434	12297.7
Sema-2a	0.453559	9.79496	6.50015e-07	1.40963e-05	14145	10985	11509	18837	17329	15875	12213	17347
E(spl)m7-HLH	0.57126	5.40736	7.12249e-07	1.53974e-05	589	480	587	888	956	727	552	857
Mnt	0.58183	5.9667	7.28707e-07	1.57284e-05	979	730	739	1504	1163	1128	816	1265
CG34057	2.18731	0.150948	7.41065e-07	1.59451e-05	9	3	5	39	29	14	5.66667	27.3333
lbk	0.481283	7.44238	8.01126e-07	1.71836e-05	2869	2006	2242	3871	3458	2961	2372.33	3430
S2P	0.478193	5.69459	8.03608e-07	1.721e-05	792	657	656	1058	1081	912	701.667	1017
CG43154	0.631771	5.81593	8.19849e-07	1.75033e-05	910	603	655	1393	1014	1054	722.667	1153.67
tty	1.24484	1.3152	8.48576e-07	1.80885e-05	24	20	24	65	51	52	22.6667	56
Sod3	0.457965	7.46994	8.53593e-07	1.81673e-05	2841	2061	2403	3768	3658	2994	2435	3473.33
CG6700	0.45393	7.77724	8.96892e-07	1.89747e-05	3353	2683	2985	4696	4419	3756	3007	4290.33
mgl	0.848687	6.7957	8.97052e-07	1.89747e-05	1869	1151	913	3009	2123	2109	1311	2413.67
lola	0.531389	7.91124	9.51938e-07	2.00125e-05	4094	2788	2802	5369	4525	4504	3228	4799.33
Spn	0.854643	4.64433	9.51058e-07	2.00125e-05	396	253	225	691	483	453	291.333	542.333
yellow-d2	1.12583	1.9455	9.49282e-07	2.00125e-05	34	38	41	106	83	70	37.6667	86.3333
CG33229	0.484665	7.49167	9.78957e-07	2.05491e-05	2730	2443	2124	3638	3656	3328	2432.33	3540.67
yellow-d	0.800249	3.30561	9.94176e-07	2.08368e-05	121	97	128	237	224	169	115.333	210
N	0.602833	9.02921	9.97e-07	2.08642e-05	8946	6051	5462	12270	10021	9644	6819.67	10645
CG14763	0.969636	2.46534	1.03719e-06	2.16066e-05	65	62	50	127	144	92	59	121
FANCI	0.569614	6.3065	1.06918e-06	2.22393e-05	1162	980	958	1441	1688	1634	1033.33	1587.67
Sin3A	0.496463	9.09907	1.08262e-06	2.24849e-05	9212	6513	6617	12222	10521	9797	7447.33	10846.7
serp	0.519109	7.75742	1.16759e-06	2.4213e-05	3706	2422	2626	4887	4474	3601	2918	4320.67
Sans	0.847798	6.45137	1.22962e-06	2.54226e-05	1108	823	1111	2607	1868	1280	1014	1918.33
dikar	0.761266	6.4212	1.25411e-06	2.58899e-05	1441	922	779	2214	1593	1647	1047.33	1818
alpha-Man-IIb	0.517618	5.31225	1.26975e-06	2.61736e-05	581	488	517	858	801	706	528.667	788.333
CG1792	0.556262	4.33559	1.38993e-06	2.83954e-05	298	239	255	421	418	371	264	403.333
dsx-c73A	1.21685	1.57687	1.42045e-06	2.88901e-05	36	14	34	67	73	62	28	67.3333
Cyp6d4	0.786815	3.34223	1.45041e-06	2.94125e-05	138	88	133	237	220	186	119.667	214.333
CG8908	1.56301	1.38636	1.48199e-06	3.00087e-05	34	18	10	46	73	68	20.6667	62.3333
Su(z)2	0.506724	5.35572	1.50406e-06	3.04107e-05	644	483	522	886	832	714	549.667	810.667
CG30497	0.858197	3.7771	1.55913e-06	3.14779e-05	219	143	114	294	289	300	158.667	294.333
tio	0.499467	6.2135	1.56532e-06	3.15565e-05	1151	898	949	1631	1436	1332	999.333	1466.33
f	0.914274	2.27686	1.6171e-06	3.24577e-05	67	39	54	106	108	98	53.3333	104
pdgy	0.570536	6.86786	1.68749e-06	3.37228e-05	1916	1299	1400	2815	2410	1881	1538.33	2368.67
Dys	0.507074	8.14021	1.7236e-06	3.41958e-05	4745	3233	3473	6227	5219	5304	3817	5583.33
CG15864	0.732996	4.25349	1.72904e-06	3.42543e-05	225	215	249	369	410	414	229.667	397.667
CG7720	1.14284	4.71924	1.75756e-06	3.47694e-05	345	217	241	938	543	368	267.667	616.333
l(3)72Dp	0.68402	3.28286	1.78756e-06	3.52613e-05	142	103	115	214	205	181	120	200
CG6220	2.30687	2.94594	1.81308e-06	3.56623e-05	13	38	67	210	315	120	39.3333	215
Fas3	0.496178	8.97886	1.86809e-06	3.66919e-05	8827	5887	5908	10708	10006	9199	6874	9971
futsch	1.17426	2.8857	1.97618e-06	3.83764e-05	94	81	43	203	141	164	72.6667	169.333
CG10962	1.84357	0.838758	2.03983e-06	3.95566e-05	16	8	11	69	39	24	11.6667	44
CG2014	2.17245	-0.115084	2.09015e-06	4.04753e-05	8	2	4	27	14	25	4.66667	22
CG12038	1.98747	1.25283	2.17729e-06	4.19853e-05	19	4	21	85	66	32	14.6667	61
CG15544	0.954547	4.75299	2.26721e-06	4.34754e-05	362	238	295	856	543	410	298.333	603
CG3921	0.461303	8.1228	2.32628e-06	4.45459e-05	4534	3569	3365	5936	5315	5094	3822.67	5448.33
spn-E	0.682471	3.53288	2.34966e-06	4.49312e-05	148	127	152	258	246	211	142.333	238.333
Cyp4ae1	0.955224	2.87538	2.37235e-06	4.53021e-05	111	77	53	178	153	150	80.3333	160.333
CG32549	0.780532	4.16244	2.44271e-06	4.65809e-05	232	157	249	440	360	339	212.667	379.667
CG32241	2.07227	-0.00765545	2.46489e-06	4.69387e-05	4	3	9	17	27	27	5.33333	23.6667
Eip75B	0.659003	5.90688	2.49595e-06	4.74646e-05	951	653	677	1597	1130	1004	760.333	1243.67
CG9727	0.625772	5.67799	2.52755e-06	4.79328e-05	862	588	528	1195	939	1000	659.333	1044.67
CG13693	1.33901	2.17815	2.60028e-06	4.91765e-05	62	36	25	127	78	112	41	105.667
Alk	0.750759	3.09384	2.60461e-06	4.91907e-05	128	86	93	184	171	178	102.333	177.667
Su(Tpl)	0.619419	6.51162	2.68072e-06	5.05586e-05	1537	982	1024	2250	1678	1669	1181	1865.67
NT1	1.21197	3.26663	2.90598e-06	5.45823e-05	107	89	82	338	197	142	92.6667	225.667
sbb	0.638821	7.71388	2.96748e-06	5.55857e-05	3599	2110	2409	5370	3929	3685	2706	4328
Jheh1	0.705146	3.97899	3.09476e-06	5.77338e-05	227	141	214	348	352	284	194	328
SKIP	0.553902	7.38996	3.11986e-06	5.81232e-05	2970	1860	1880	3887	3222	3006	2236.67	3371.67
Awh	1.00269	1.96617	3.12932e-06	5.82205e-05	42	41	39	86	103	67	40.6667	85.3333
east	0.702931	7.2584	3.20218e-06	5.94154e-05	2615	1668	1477	3895	2788	2919	1920	3200.67
E(spl)mbeta-HLH	0.52781	6.92471	3.20654e-06	5.94161e-05	1757	1382	1703	2560	2781	1962	1614	2434.33
jing	0.603264	6.63037	3.22762e-06	5.97261e-05	1738	1053	1093	2370	1947	1744	1294.67	2020.33
CG1815	0.440835	7.87746	3.28033e-06	6.06201e-05	3773	2837	3140	5000	4417	4286	3250	4567.67
CG13454	3.62119	-1.17893	3.37042e-06	6.20347e-05	0	1	1	8	14	8	0.666667	10
CG5987	0.749914	3.43305	3.38747e-06	6.22651e-05	121	120	144	234	238	206	128.333	226
unc-104	0.560259	4.94688	3.39767e-06	6.23692e-05	497	351	369	673	598	582	405.667	617.667
CG1441	1.42127	0.918112	3.40328e-06	6.2389e-05	9	18	19	47	44	39	15.3333	43.3333
mura	0.714599	5.95779	3.41014e-06	6.24314e-05	1064	679	580	1593	1169	1148	774.333	1303.33
CG32512	1.2424	3.81297	3.48614e-06	6.36533e-05	156	121	125	408	438	161	134	335.667
Pex7	1.6752	0.26645	3.49814e-06	6.37877e-05	14	4	7	24	31	28	8.33333	27.6667
Sesn	1.25745	1.78124	3.59686e-06	6.53279e-05	37	27	31	55	106	75	31.6667	78.6667
CG12717	0.562767	4.49243	3.74045e-06	6.75788e-05	334	278	269	427	495	429	293.667	450.333
CG3349	2.77767	-0.857526	3.73859e-06	6.75788e-05	1	1	3	15	14	9	1.66667	12.6667
Lip1	1.56462	0.683942	3.89809e-06	7.01504e-05	9	9	18	30	47	35	12	37.3333
CG42340	0.975948	2.41943	4.05353e-06	7.27572e-05	61	49	61	150	103	98	57	117
CG11263	1.27712	0.913266	4.06788e-06	7.29196e-05	23	13	14	44	45	37	16.6667	42
mex1	3.37807	-0.966232	4.0893e-06	7.3208e-05	1	0	2	6	19	11	1	12
Gyc76C	0.506437	6.61208	4.1571e-06	7.42085e-05	1566	1180	1205	1894	1890	1997	1317	1927
HDAC4	0.478434	5.598	4.20306e-06	7.48547e-05	807	588	584	1039	968	847	659.667	951.333
CG6362	1.38032	0.836199	4.29356e-06	7.62832e-05	22	10	13	42	35	44	15	40.3333
CG15745	0.757658	2.71072	4.42727e-06	7.8541e-05	94	69	70	137	152	120	77.6667	136.333
CG8145	0.55279	4.47003	4.53284e-06	8.01054e-05	313	268	288	435	460	430	289.667	441.667
CG42727	0.560989	4.35056	4.54934e-06	8.02939e-05	324	233	245	423	458	347	267.333	409.333
CG42726	0.560989	4.35056	4.56297e-06	8.04311e-05	324	233	245	423	458	347	267.333	409.333
CG15279	0.776421	2.79736	4.9099e-06	8.62149e-05	92	77	76	133	164	139	81.6667	145.333
Osi24	1.66571	2.78422	5.32791e-06	9.30794e-05	88	31	42	281	142	100	53.6667	174.333
PH4alphaEFB	0.471841	5.92191	5.35463e-06	9.33091e-05	994	710	780	1312	1258	1005	828	1191.67
st	3.7057	-1.11555	5.35218e-06	9.33091e-05	0	0	2	18	8	6	0.666667	10.6667
kuz	0.610162	6.65639	5.50427e-06	9.56741e-05	1749	1129	1060	2463	1921	1796	1312.67	2060
CG41378	0.526449	5.27218	5.66754e-06	9.83876e-05	530	473	529	747	824	730	510.667	767
Nep2	0.772509	6.85172	5.78589e-06	9.99374e-05	1875	1074	1266	3366	2267	1802	1405	2478.33
EcR	0.573745	6.25155	6.0091e-06	0.000103274	1235	914	850	1419	1528	1634	999.667	1527
Syp	0.887238	7.65963	6.05561e-06	0.000103943	3301	2109	1622	6145	3632	3575	2344	4450.67
CG43736	0.438982	7.1288	6.40848e-06	0.000109318	2258	1659	1891	2958	2754	2451	1936	2721
Gr93a	2.12277	-0.146484	6.53769e-06	0.000111209	7	4	3	29	12	23	4.66667	21.3333
miple2	0.41992	9.33844	6.7506e-06	0.000114444	9753	8188	8998	13484	13183	10960	8979.67	12542.3
zfh2	0.511024	8.67997	6.87658e-06	0.000116436	6501	5046	4993	8884	7162	8253	5513.33	8099.67
Pif1A	0.573525	7.08524	6.93154e-06	0.000117222	2109	1571	1658	3464	2526	2266	1779.33	2752
CG18336	1.21605	1.31049	6.97465e-06	0.000117806	30	17	22	51	74	42	23	55.6667
CG7409	1.20405	1.53326	7.68023e-06	0.00012909	35	23	24	55	59	80	27.3333	64.6667
CG32809	0.51538	5.22099	8.04371e-06	0.000134869	526	434	528	766	752	696	496	738
CG33144	0.498366	5.2987	8.13541e-06	0.000136241	633	488	470	866	767	697	530.333	776.667
pan	0.502773	6.35198	8.46512e-06	0.000141418	1331	977	999	1665	1519	1640	1102.33	1608
CG13749	0.947032	2.13227	8.81875e-06	0.00014679	48	46	47	82	117	85	47	94.6667
sol	0.450064	6.79854	9.09418e-06	0.000151192	1919	1290	1411	2272	2288	1954	1540	2171.33
CG33062	0.684127	3.85852	9.18721e-06	0.000152554	174	170	190	276	327	293	178	298.667
Itp-r83A	0.453801	7.18969	9.34279e-06	0.000154951	2431	1726	1880	3097	2747	2690	2012.33	2844.67
CG10631	0.445397	6.95796	9.80975e-06	0.000162108	1968	1554	1614	2719	2379	2167	1712	2421.67
CG14446	1.04914	4.53769	1.00515e-05	0.00016574	381	221	147	671	434	471	249.667	525.333
Adar	0.425074	6.72187	1.04618e-05	0.000172263	1652	1334	1404	2203	2067	1857	1463.33	2042.33
CG16710	0.994056	2.27835	1.04989e-05	0.000172469	61	40	53	88	141	90	51.3333	106.333
ed	0.428637	9.58976	1.08131e-05	0.00017741	13096	9359	9776	16149	14537	14064	10743.7	14916.7
CG4049	0.532269	5.91586	1.11172e-05	0.000181965	1020	750	649	1376	1191	1050	806.333	1205.67
Spn77Ba	0.389958	7.50788	1.15021e-05	0.000187595	2972	2256	2469	3687	3734	3058	2565.67	3493
CG1718	0.967763	4.03652	1.15206e-05	0.000187674	202	196	138	268	388	425	178.667	360.333
obst-B	0.442072	7.24528	1.27686e-05	0.000205328	2622	1792	1904	2973	3158	2721	2106	2950.67
CG9948	0.504872	4.55889	1.27959e-05	0.000205526	350	299	295	487	503	406	314.667	465.333
Bx	0.566137	5.20862	1.32451e-05	0.000211753	634	436	392	702	828	698	487.333	742.667
CG10426	0.7366	2.9856	1.33877e-05	0.000213783	108	83	94	193	148	152	95	164.333
Obp93a	2.87162	-1.02329	1.34584e-05	0.000214662	0	2	2	9	15	9	1.33333	11
CG31785	1.19494	1.45572	1.35302e-05	0.000215558	29	29	19	81	61	43	25.6667	61.6667
CG16719	0.935806	1.91056	1.3668e-05	0.000217502	54	38	30	79	80	82	40.6667	80.3333
CG7852	0.469955	5.70209	1.45289e-05	0.000230401	869	563	706	1087	1017	951	712.667	1018.33
kis	0.467216	9.61627	1.48382e-05	0.000234765	13180	9499	9649	17695	14196	14234	10776	15375
CG42368	1.42383	0.653882	1.49447e-05	0.000235635	13	8	17	34	46	27	12.6667	35.6667
Bruce	0.453025	8.24115	1.53315e-05	0.000241182	5004	3782	3721	6764	5497	5446	4169	5902.33
Pka-C3	0.853546	3.98091	1.56982e-05	0.000246387	252	133	166	443	332	252	183.667	342.333
Rbcn-3B	0.582796	5.08419	1.59308e-05	0.000249632	560	371	399	821	631	604	443.333	685.333
BtbVII	0.531673	5.07183	1.63016e-05	0.000254983	583	374	392	706	674	626	449.667	668.667
ths	0.476992	6.00175	1.77993e-05	0.000277149	949	853	798	1174	1346	1241	866.667	1253.67
CG12003	1.13003	1.61532	1.78249e-05	0.000277233	42	23	25	71	89	45	30	68.3333
Nep1	0.822195	4.02641	1.81334e-05	0.000281396	269	134	175	440	325	284	192.667	349.667
tutl	0.457235	7.11032	1.91391e-05	0.000295666	2360	1608	1749	3009	2610	2476	1905.67	2698.33
bcd	1.40914	0.9818	1.93708e-05	0.000298911	20	20	9	62	36	38	16.3333	45.3333
Egfr	0.451735	8.64306	1.94842e-05	0.000299987	6862	4681	5051	9069	7808	6603	5531.33	7826.67
Gap1	0.426524	6.59203	1.97195e-05	0.000303269	1630	1166	1235	1998	1874	1726	1343.67	1866
Camta	0.669012	5.07071	2.01309e-05	0.000309251	565	362	348	837	588	654	425	693
CG42342	0.521263	6.35649	2.03359e-05	0.000312052	1384	849	1075	1895	1600	1404	1102.67	1633
klu	0.564092	5.73006	2.06378e-05	0.000316331	928	522	661	1266	1059	888	703.667	1071
CG31635	0.469309	6.53814	2.06834e-05	0.000316677	1403	1142	1248	1820	1746	1868	1264.33	1811.33
CG10211	0.545655	5.87371	2.08437e-05	0.000318143	1020	697	626	1374	1156	999	781	1176.33
sca	0.571857	5.75928	2.08246e-05	0.000318143	967	534	650	1267	1021	987	717	1091.67
CG42759	1.13753	1.2756	2.08629e-05	0.000318143	29	20	21	45	52	62	23.3333	53
sls	0.740669	5.85081	2.09654e-05	0.000318908	895	746	473	1324	1027	1276	704.667	1209
bbg	0.392993	8.33633	2.11598e-05	0.00032111	5321	3938	4409	6822	6357	5448	4556	6209
Spn43Aa	1.45202	7.39086	2.12108e-05	0.000321175	1779	889	1753	7457	3505	1762	1473.67	4241.33
Syx4	2.83149	-1.05432	2.12034e-05	0.000321175	2	2	0	11	14	7	1.33333	10.6667
ds	0.450507	9.4694	2.15911e-05	0.000326215	12006	8936	8440	15802	13207	12496	9794	13835
CG34383	0.658839	6.33825	2.15853e-05	0.000326215	1380	914	799	2033	1395	1575	1031	1667.67
CG30020	0.389794	7.40186	2.20374e-05	0.000331501	2655	2196	2278	3240	3305	3146	2376.33	3230.33
CG4294	0.412472	7.25222	2.20369e-05	0.000331501	2350	1949	2067	3015	2978	2808	2122	2933.67
CG5921	1.39554	1.10362	2.20208e-05	0.000331501	23	15	16	72	48	29	18	49.6667
CG8405	0.475971	6.30409	2.30248e-05	0.000345598	1289	1012	928	1718	1470	1458	1076.33	1548.67
CG9521	1.40931	1.16798	2.31161e-05	0.000346591	29	18	10	36	59	60	19	51.6667
CG2121	1.17692	1.04991	2.41753e-05	0.000360116	22	19	17	43	41	52	19.3333	45.3333
flfl	0.528951	7.43703	2.44228e-05	0.000363016	3054	1999	1941	4008	3075	3266	2331.33	3449.67
CG10077	0.38715	9.27604	2.45266e-05	0.000363771	9673	7713	8796	12469	12196	10937	8727.33	11867.3
Hsepi	0.418786	5.73566	2.46723e-05	0.000365538	906	661	663	1103	1047	934	743.333	1028
Sema-1b	0.405697	8.73758	2.51257e-05	0.000371855	7318	5375	5313	8908	8116	7613	6002	8212.33
CG30183	0.425022	6.00798	2.55099e-05	0.00037673	1048	828	804	1366	1257	1112	893.333	1245
Hexo2	1.56666	0.314759	2.5777e-05	0.000379858	6	11	10	31	36	18	9	28.3333
CG14963	0.929241	2.88984	2.59717e-05	0.000381909	73	103	65	180	169	136	80.3333	161.667
CG4497	0.491211	4.86522	2.65443e-05	0.000389912	452	351	375	568	600	548	392.667	572
CG30026	2.62871	-0.965633	2.68262e-05	0.000393633	2	0	3	9	13	12	1.66667	11.3333
mth	0.380841	7.78939	2.69336e-05	0.000393947	3517	2799	3054	4598	4307	3785	3123.33	4230
CG7896	0.413956	7.62862	2.78218e-05	0.000405213	3298	2359	2653	4359	3752	3360	2770	3823.67
scrib	0.473258	8.18927	2.7805e-05	0.000405213	4999	3385	3631	6216	5168	5733	4005	5705.67
eIF4G2	0.513287	6.15882	2.78563e-05	0.000405288	1197	861	827	1594	1278	1368	961.667	1413.33
CG7156	0.495811	4.5298	2.79449e-05	0.000406147	383	279	272	481	461	420	311.333	454
CG16798	0.82343	2.41365	2.80141e-05	0.000406722	72	60	51	101	138	98	61	112.333
CG5098	0.425481	6.26372	2.8343e-05	0.00041063	1224	929	1046	1615	1497	1347	1066.33	1486.33
Gug	0.440858	7.69641	2.8562e-05	0.000413368	3582	2429	2634	4543	3786	3759	2881.67	4029.33
dlg1	0.658711	5.33295	2.9812e-05	0.0004301	721	443	379	975	760	757	514.333	830.667
CG31688	0.541817	5.39743	3.00508e-05	0.00043309	732	471	483	981	780	764	562	841.667
CG8366	0.516082	5.10942	3.02993e-05	0.000436175	500	409	469	708	797	556	459.333	687
skd	0.413839	7.34841	3.1203e-05	0.000448286	2668	2084	2075	3503	2940	2971	2275.67	3138
CG8105	1.43347	0.304519	3.13942e-05	0.000450562	10	9	10	25	30	27	9.66667	27.3333
lea	0.396194	8.56439	3.215e-05	0.000459969	6384	4628	5003	8078	7154	6577	5338.33	7269.67
glec	0.468887	6.01104	3.34619e-05	0.00047824	1024	727	891	1468	1214	1111	880.667	1264.33
CG32486	0.447738	6.14395	3.3964e-05	0.00048441	1049	832	1027	1437	1434	1258	969.333	1376.33
stl	2.45822	-0.708876	3.46097e-05	0.000493107	2	1	4	23	11	8	2.33333	14
CG6287	0.769066	7.2195	3.46973e-05	0.000493844	2413	1304	1735	4358	3164	2101	1817.33	3207.67
CG8180	0.555243	4.82456	3.53318e-05	0.000500801	433	292	393	544	597	556	372.667	565.667
Reph	0.722521	3.6695	3.54024e-05	0.000501285	202	133	132	324	228	242	155.667	264.667
CG17230	0.465127	4.97082	3.55947e-05	0.000503489	486	372	423	650	627	559	427	612
su(w[a])	0.367762	8.46124	3.6431e-05	0.00051426	5923	4417	4719	7022	7013	6097	5019.67	6710.67
Ephrin	0.40233	7.50611	3.67439e-05	0.000517085	2919	2439	2276	3557	3458	3435	2544.67	3483.33
ttk	0.507507	6.96124	3.71328e-05	0.000521491	2050	1454	1540	3053	2378	2010	1681.33	2480.33
CG6191	0.483259	6.02667	3.74364e-05	0.000524683	986	767	894	1215	1278	1331	882.333	1274.67
Mrtf	0.610006	5.71242	3.78911e-05	0.000529435	956	548	549	1236	944	1016	684.333	1065.33
Kdm4A	0.513385	4.92466	3.8392e-05	0.000535346	485	393	340	591	661	551	406	601
CG2865	0.642596	4.36234	3.8542e-05	0.000536894	347	248	190	464	420	379	261.667	421
CG34187	1.50698	0.257389	3.86853e-05	0.000538344	11	9	7	29	21	30	9	26.6667
Ef1alpha100E	1.51681	5.60744	3.98617e-05	0.000553035	561	275	410	2322	941	467	415.333	1243.33
if	0.486293	6.63168	4.00322e-05	0.000554282	1675	1108	1272	2312	1816	1735	1351.67	1954.33
Pde11	0.492363	5.54607	4.26388e-05	0.00058978	827	546	534	1025	897	839	635.667	920.333
app	0.565207	5.21645	4.28201e-05	0.000591322	629	469	370	834	719	687	489.333	746.667
svp	0.889178	2.62427	4.28363e-05	0.000591322	100	47	62	154	115	127	69.6667	132
CG2493	0.372116	8.17502	4.29356e-05	0.000592098	4875	3585	3873	5903	5851	4805	4111	5519.67
lilli	0.521753	6.10997	4.33118e-05	0.000596089	1220	761	812	1564	1264	1286	931	1371.33
CG3857	0.457597	6.13959	4.36119e-05	0.00059962	1226	853	836	1423	1534	1183	971.667	1380
CG1637	0.477838	4.85919	4.4224e-05	0.000607428	446	341	392	574	601	529	393	568
eap	0.625925	3.46344	4.48743e-05	0.000613908	680	573	568	571	564	422	607	519
CG3987	0.912703	1.88812	4.61771e-05	0.000631103	52	41	28	91	84	62	40.3333	79
CG13731	1.02842	2.85365	4.65235e-05	0.000633318	121	53	58	207	138	137	77.3333	160.667
CG32676	0.41417	7.01851	4.70936e-05	0.000640445	2175	1484	1788	2689	2572	2247	1815.67	2502.67
trol	0.553716	8.31173	4.81214e-05	0.000652487	5564	3770	3363	7798	5713	5658	4232.33	6389.67
trpm	0.441379	6.03294	4.82482e-05	0.000652918	1049	847	811	1289	1252	1261	902.333	1267.33
cnn	0.425352	6.82196	4.94153e-05	0.000668054	1672	1418	1600	2127	2285	2137	1563.33	2183
CG43902	1.97894	-0.530927	4.97131e-05	0.000670762	6	2	3	12	20	14	3.66667	15.3333
olf413	0.376658	7.32804	5.03332e-05	0.000678461	2568	2090	2156	3339	3127	2738	2271.33	3068
capu	0.396553	6.79799	5.0797e-05	0.000684043	1737	1360	1583	2252	2255	1904	1560	2137
stai	0.410394	9.29529	5.18213e-05	0.000695791	9825	7385	9120	13537	11932	10895	8776.67	12121.3
rn	0.47965	7.02916	5.37945e-05	0.000720877	2382	1512	1489	2821	2570	2317	1794.33	2569.33
scyl	0.537929	8.21625	5.39111e-05	0.000721737	4949	3473	3494	7665	5443	4819	3972	5975.67
CG13083	1.75627	-0.145729	5.45174e-05	0.000728435	3	6	8	27	17	17	5.66667	20.3333
CG7970	0.416322	6.53437	5.52217e-05	0.000734814	1487	1131	1257	1977	1925	1484	1291.67	1795.33
Atx2	0.542964	6.44341	5.5262e-05	0.000734814	1568	928	1003	2077	1642	1514	1166.33	1744.33
kto	0.400973	7.21157	5.72399e-05	0.000758181	2525	1813	1921	3068	2814	2654	2086.33	2845.33
mei-W68	0.637789	3.93031	5.86822e-05	0.000774301	238	183	158	369	278	285	193	310.667
CG8249	0.954748	2.26832	5.95708e-05	0.00078452	68	51	37	138	94	82	52	104.667
CG11905	1.14206	3.18053	6.00709e-05	0.000790349	109	66	97	323	178	127	90.6667	209.333
CG9422	0.444159	5.01819	6.01346e-05	0.00079043	501	397	436	638	672	576	444.667	628.667
Cad99C	0.392934	7.96053	6.17887e-05	0.000811397	4254	2990	3316	5320	4627	4378	3520	4775
htt	0.456512	6.59356	6.32847e-05	0.000828667	1602	1170	1213	2133	1700	1809	1328.33	1880.67
fwd	0.422622	7.22154	6.36125e-05	0.000831377	2532	1899	1815	3156	2774	2716	2082	2882
Chd1	0.420755	7.17786	6.45365e-05	0.000841852	2497	1754	1824	3178	2836	2403	2025	2805.67
CG9392	2.09499	-0.549477	6.47748e-05	0.00084416	0	4	6	13	19	14	3.33333	15.3333
CG43759	0.411736	6.41159	6.55402e-05	0.000851723	1404	1006	1162	1758	1618	1538	1190.67	1638
rk	1.35932	1.24287	6.5541e-05	0.000851723	26	13	22	81	53	30	20.3333	54.6667
CG10472	1.70842	-0.179169	6.56166e-05	0.0008519	4	7	6	24	21	14	5.66667	19.6667
PNUTS	0.368266	8.09757	6.72863e-05	0.000869473	4390	3394	3883	5705	5375	4587	3889	5222.33
CG14855	2.3345	-0.26483	6.77192e-05	0.000872607	3	4	4	36	12	12	3.66667	20
CG13293	0.821839	2.08524	6.92497e-05	0.000890659	44	48	52	95	86	85	48	88.6667
salm	0.373454	7.56513	7.00933e-05	0.000900666	3299	2345	2448	3864	3627	3333	2697.33	3608
ihog	0.395512	8.39535	7.16183e-05	0.000917689	5955	4046	4296	7127	6457	5815	4765.67	6466.33
pum	0.523231	6.47549	7.15833e-05	0.000917689	1601	1005	996	2096	1668	1555	1200.67	1773
CG32264	0.4768	6.43817	7.26614e-05	0.000930187	1551	944	1078	1929	1655	1527	1191	1703.67
CG42346	0.91832	1.65919	7.31178e-05	0.00093516	36	26	40	78	66	57	34	67
CG42389	0.67866	6.06571	7.38336e-05	0.000943437	1165	706	674	1852	1184	1148	848.333	1394.67
CG43143	0.529688	5.28837	7.50198e-05	0.000955044	692	396	486	898	765	674	524.667	779
CG14949	2.25663	-0.855815	7.51911e-05	0.000956339	3	3	1	8	13	15	2.33333	12
